# Supplementary material for: Novel Pathways Revealed in Bursa of Fabricius Transcriptome in Response to Extraintestinal Pathogenic Escherichia coli (ExPEC) Infection
Source: PLoS One. 2015 Nov 10;10(11):e0142570. doi: 10.1371/journal.pone.0142570 (PMC4640532; doi:10.1371/journal.pone.0142570)
Supplement: S1 Table — (XLSX) [file pone.0142570.s001.xlsx]

## Sheet: primers sequence
	Gene	Forward Sequence (5’-3’)	Reverse Sequence (5’-3’)
	BLNK	GATACTTGGGATCGGCTAAA	GAGTGGCCATCTGGATTT
	BTK	AGCAGGAATGGCAGTTTA	CACCACCTTCTTCATTTCAC
	CASP3	CCAAAGGAATGAACTTACCTG	CTGAACGAGATGACAGTCC
	CASP10	GCGAATTTCTTTCAGAGGTAG	GGATCAAGTCAGTACAGAGAA
	CD28	CAGTCTTTATAATCTACCGGCAAAA	TTGTTCTTCTGGTGAGGTGGA
	IFNG	GTGAAGAAGGTGAAAGATATCATGGA	GCTTTGCGCTGGATTCTCA
	CD3Z	GCCAGGACGATGTGTATAA	TCTGCAGGGAAGAGTAAAC
	ZAP70	ACCCACGAGGAAGATTAAG	ATGCTGCCATAGTAGAAGG
	LCK	CACCGGAGGCTATCAATTAC	GTTGGTCATCCCTGGATATG
	FAS	GCGAGTCATGTACTGTATGT	CTGTGTTACCTTGGGTAGTAT
	pIgR	GGATCCGACGTGCAGATCCAGCTCCTTCGT	TCACCATCATCGACTTCCCAGAGCAGG
