# Supplementary material for: Novel Pathways Revealed in Bursa of Fabricius Transcriptome in Response to Extraintestinal Pathogenic Escherichia coli (ExPEC) Infection
Source: PLoS One. 2015 Nov 10;10(11):e0142570. doi: 10.1371/journal.pone.0142570 (PMC4640532; doi:10.1371/journal.pone.0142570)
Supplement: S2 Table — Legends: NA, not available; S5, day 5 susceptible birds; NC5, day 5 non-challenged birds; R5, day 5 resistant birds; S1, day 1 susceptible birds. (XLSX) [file pone.0142570.s002.xlsx]

## Sheet: up_commone DEG(62)
Up-regulated differentially expressed genes (DEG) (N = 62)
gene id	transcript id	gene associated name	Fold change			FDR
			S5 vs. NC5	S5 vs. R5	S5 vs. S1	S5 vs. NC5	S5 vs. R5	S5 vs. S1
ENSGALG00000000466	ENSGALT00000000635	LCK	7.63452	8.77687	8.97111	0.00184679	0.001036	0.00192204
ENSGALG00000000583	ENSGALT00000000813	SOX13	5.28245	3.44918	3.78937	0.00137163	0.0228575	0.0353206
ENSGALG00000001486	ENSGALT00000002254	ZAP70	7.96701	11.0685	9.2805	0.00144475	0.000268269	0.00141674
ENSGALG00000001544	ENSGALT00000002347	ADAMTS10	3.38403	2.51943	3.73355	0.00133393	0.0228575	0.00124093
ENSGALG00000002113	ENSGALT00000003301	SLP76	3.40099	2.84807	2.69418	0.0011376	0.00821598	0.0329758
ENSGALG00000003160	ENSGALT00000005000	CERS1	6.89026	6.21649	5.29485	0.00378939	0.0102028	0.0449983
ENSGALG00000003161	ENSGALT00000005001	CVG1	4.63299	4.10004	4.75398	0.002234	0.00775749	0.00602704
ENSGALG00000003433	ENSGALT00000005435	NA	17.9235	8.45776	10.1521	4.53452e-05	0.001036	0.000618017
ENSGALG00000003750	ENSGALT00000005954	PLCG1	4.30262	3.30252	2.90967	6.54617e-05	0.000830315	0.00735954
ENSGALG00000003792	ENSGALT00000006016	FYB	4.82053	3.67112	3.66941	0.000797061	0.00723169	0.0153849
ENSGALG00000003857	ENSGALT00000006130	ITK	7.87868	10.9346	6.80786	0.0015227	0.000307098	0.00815948
ENSGALG00000004121	ENSGALT00000006563	LPAR4	10.2554	12.3416	13.6599	0.000963311	0.000307098	0.00031545
ENSGALG00000004662	ENSGALT00000007427	DISP3	4.29534	3.3	3.44354	0.000890363	0.00821598	0.0118928
ENSGALG00000004724	ENSGALT00000007522	NA	4.39626	3.943	5.76908	0.00946205	0.0265744	0.00815948
ENSGALG00000005539	ENSGALT00000008885	ITM2C	6.67063	6.33773	5.72214	0.000963311	0.00123884	0.0060173
ENSGALG00000005543	ENSGALT00000008892	NA	26.2302	19.3116	16.9058	0.000186512	0.000307098	0.00112878
ENSGALG00000006344	ENSGALT00000010254	GSTT1	16.8	12.1429	9.19281	9.43458e-05	0.000228443	0.00216104
ENSGALG00000007012	ENSGALT00000011347	ARRDC4	3.33133	2.07635	2.20798	0.000144538	0.0268595	0.0402414
ENSGALG00000007416	ENSGALT00000011996	CD3E	7.09164	7.16219	5.28247	0.000146639	4.42874e-05	0.00178739
ENSGALG00000007895	ENSGALT00000012820	LDLRAD3	6.74081	6.12333	5.23834	0.00431809	0.0105168	0.0451008
ENSGALG00000008425	ENSGALT00000013724	MAP1A	5.59562	3.12229	3.71773	0.000236197	0.017039	0.0104675
ENSGALG00000008656	ENSGALT00000014100	ICOS	3.84728	3.13747	3.43006	0.00426568	0.0246798	0.0381835
ENSGALG00000009415	ENSGALT00000015334	SMOC1	8.13053	8.10202	6.45837	0.00129512	0.0014448	0.0102762
ENSGALG00000010122	ENSGALT00000016464	SH2D4A	5.17862	2.36042	2.72575	7.67946e-05	0.0409283	0.0420046
ENSGALG00000010529	ENSGALT00000017142	LEF-1	70.2812	60.5657	93.4953	7.21881e-05	2.1699e-05	8.02591e-06
ENSGALG00000010743	ENSGALT00000017480	LRRC42	3.85665	4.00694	4.84759	0.0109451	0.0166831	0.0117453
ENSGALG00000010820	ENSGALT00000017591	CHGA	5.63734	4.01118	5.36664	0.005261	0.0339294	0.0268164
ENSGALG00000011220	ENSGALT00000018296	SLC25A29	8.98152	3.29148	2.47042	5.73085e-09	0.00115732	0.0467796
ENSGALG00000020002	ENSGALT00000018901	SLC22A3	12.6073	5.16492	6.54553	6.1769e-05	0.00626054	0.00293682
ENSGALG00000011623	ENSGALT00000018988	ADAMTS3	5.69262	4.86755	5.54883	0.00136499	0.0048744	0.00476415
ENSGALG00000011811	ENSGALT00000019277	SYNE2	3.26885	1.87179	2.02579	3.1326e-05	0.0332724	0.0401535
ENSGALG00000012046	ENSGALT00000019676	ARPP21	37.6558	43.0454	32.8103	7.43933e-05	1.24834e-05	3.9258e-05
ENSGALG00000012056	ENSGALT00000019693	GRAP2	22.6177	27.5755	24.5281	0.000236197	2.90051e-05	0.000104028
ENSGALG00000012346	ENSGALT00000020170	HECW1	10.7852	10.4542	10.5527	0.002234	0.00329232	0.0066431
ENSGALG00000013672	ENSGALT00000022232	TSHZ1	10.6042	5.96471	5.02606	5.63465e-05	0.00119128	0.00815948
ENSGALG00000014268	ENSGALT00000023080	CHRNA9	7.53619	8.86367	5.75116	0.00270692	0.00168542	0.0327868
ENSGALG00000014343	ENSGALT00000023171	ARAP2	6.60501	4.5138	3.33751	3.53117e-05	0.000492115	0.0166149
ENSGALG00000015136	ENSGALT00000024423	ILDR1	6.33919	4.88609	3.71417	0.000179586	0.000993022	0.0177054
ENSGALG00000015290	ENSGALT00000024678	LIX1	6.33624	6.04407	7.91144	0.00629261	0.012583	0.00815948
ENSGALG00000015441	ENSGALT00000024905	CD247	3.54972	3.91004	4.57221	0.0316206	0.0343957	0.04815
ENSGALG00000015463	ENSGALT00000024930	CD2	3.96777	3.17205	3.57149	0.00130485	0.0110869	0.00848563
ENSGALG00000015767	ENSGALT00000025427	FABP4	79.0545	51.6436	28.9278	0.000146898	0.00021131	0.00275659
ENSGALG00000015768	ENSGALT00000025431	ANKRD6	4.44533	3.00285	2.78734	0.000220284	0.00755939	0.0332637
ENSGALG00000016049	ENSGALT00000025855	RRM2B	7.98927	7.96865	5.7638	0.000380636	0.000268269	0.00575865
ENSGALG00000017040	ENSGALT00000027531	NA	8.46316	6.8199	5.76443	0.00179643	0.00705327	0.0335917
ENSGALG00000006983	ENSGALT00000033285	DNTT	33.4309	40.9318	39.5773	0.000156345	2.1699e-05	3.9258e-05
ENSGALG00000021226	ENSGALT00000034196	NOVEL	7.28068	6.90046	4.3534	0.00100482	0.00127353	0.0420046
ENSGALG00000003792	ENSGALT00000034292	FYB	7.58826	5.7963	4.98044	0.00112269	0.00585957	0.0315111
ENSGALG00000021304	ENSGALT00000034345	RANBP3L	7.97645	5.20968	6.85282	0.00018411	0.00219281	0.000525809
ENSGALG00000003106	ENSGALT00000034624	NOVEL	6.88873	5.93908	6.24536	0.00170998	0.00521513	0.00815948
ENSGALG00000015362	ENSGALT00000036882	TRAT1	48.105	38.7255	40.0871	5.56725e-05	2.1699e-05	3.9258e-05
ENSGALG00000014477	ENSGALT00000037104	CD4	26.3007	29.2753	33.6116	0.000234227	4.42874e-05	3.9258e-05
ENSGALG00000015425	ENSGALT00000037774	LPL	10.3602	7.42764	7.31322	0.000564334	0.00245129	0.00613414
ENSGALG00000004418	ENSGALT00000038508	SS2R	16.0714	7.61237	5.21056	0.000125567	0.0022389	0.0340984
ENSGALG00000023395	ENSGALT00000038622	PLIN1	27.9606	14.4318	15.5826	0.000284764	0.00214789	0.00352114
ENSGALG00000014877	ENSGALT00000038929	ZOV3	6.1402	5.57293	4.29276	0.000963311	0.00185785	0.0248514
ENSGALG00000002893	ENSGALT00000040996	STC2	29.98	20.4411	5.98207	2.79274e-05	2.32919e-05	0.0386376
ENSGALG00000028422	ENSGALT00000042806	NA	3.01298	1.99965	2.38131	0.000844596	0.0470112	0.0327868
ENSGALG00000027027	ENSGALT00000043904	FBXL7	3.31309	2.29185	2.39262	0.000378463	0.0194129	0.0329758
ENSGALG00000026891	ENSGALT00000044551	NINJ1	6.19755	5.40201	4.5009	0.000241898	0.000477653	0.00530484
ENSGALG00000027090	ENSGALT00000045685	NA	34.4522	8.04516	33.4928	0.000469706	0.0282507	0.000525809
ENSGALG00000025988	ENSGALT00000046012	RORC	21.0648	17.8788	12.391	0.000706928	0.000995577	0.00815948

## Sheet: down_common DEG(5)
Down-regulated differentially expressed genes (DEG) (N = 5)
gene id	transcript id	gene associated name	Fold change			FDR
			S5 vs. NC5	S5 vs. R5	S5 vs. S1	S5 vs. NC5	S5 vs. R5	S5 vs. S1
ENSGALG00000004958	ENSGALT00000007950	BTK	-2.1022	-1.70685	-1.88651	0.00170272	0.0457923	0.0433973
ENSGALG00000016665	ENSGALT00000026894	FDFT1	-4.02185	-2.83245	-1.91441	2.1329e-09	1.73508e-05	0.0378885
ENSGALG00000022316	ENSGALT00000035889	NOVEL	-4.63533	-2.77984	-3.01865	3.31023e-05	0.0110869	0.0108849
ENSGALG00000022586	ENSGALT00000036163	HPX	-11.6342	-3.04095	-4.18779	1.5282e-08	0.0228048	0.00575865
ENSGALG00000000162	ENSGALT00000041213	NOVEL	-27.5152	-29.8144	-23.5283	4.89077e-08	5.06424e-08	7.04911e-07

## Sheet: up_shared DEG(2)
Up-regulated differentially expressed genes (DEG) (N = 2)
gene id	transcript id	gene associated name	Fold change		FDR
			S5 vs. R5	S5 vs. S1	S5 vs. R5	S5 vs. S1
ENSGALG00000010978	ENSGALT00000017884	ANGPTL3	4.76602	11.2389	0.0194129	0.000351412
ENSGALG00000004772	ENSGALT00000028239	NOVEL	3.92316	7.14162	0.0398375	0.00642375

## Sheet: up_shared DEG(14)
Up-regulated differentially expressed genes (DEG) (N = 14)
gene id	transcript id	gene associated name	Fold change		FDR
			S5 vs. NC5	S5 vs. S1	S5 vs. NC5	S5 vs. S1
ENSGALG00000005141	ENSGALT00000008254	HMCN1	1.99245	2.32829	0.0321035	0.0420046
ENSGALG00000005521	ENSGALT00000008858	PER2	3.48013	2.54697	6.54617e-05	0.00613414
ENSGALG00000005544	ENSGALT00000008893	GPR55	4.04378	4.71847	0.0188979	0.0424703
ENSGALG00000007617	ENSGALT00000012318	ANO1	2.48874	2.36035	0.0041146	0.0327868
ENSGALG00000009034	ENSGALT00000014702	ALK	4.55481	4.59343	0.00277997	0.00815948
ENSGALG00000009626	ENSGALT00000015678	THBS1	2.2698	2.15579	0.00427463	0.0349267
ENSGALG00000009724	ENSGALT00000015827	GREM1	6.93744	3.88564	0.00059719	0.03763
ENSGALG00000010259	ENSGALT00000017322	COL28A1	4.44558	9.97195	0.0461233	0.0118928
ENSGALG00000012193	ENSGALT00000019909	FKBP9	1.77723	2.36492	0.0384853	0.00815948
ENSGALG00000013102	ENSGALT00000021390	COBL	2.48612	2.42625	0.00318656	0.0166149
ENSGALG00000015451	ENSGALT00000024915	ZNF462	3.34568	2.28819	0.000236197	0.0387281
ENSGALG00000016289	ENSGALT00000026264	DST	2.59335	1.98613	0.00018411	0.0256742
ENSGALG00000016293	ENSGALT00000026276	BMP5	1.99064	2.20176	0.0201267	0.0386113
ENSGALG00000027299	ENSGALT00000044680	NTF3	2.60951	2.87632	0.0160539	0.0386113

## Sheet: down_shared DEG(3)
Down-regulated differentially expressed genes (DEG) (N = 3)
gene id	transcript id	gene associated name	Fold change		FDR
			S5 vs. NC5	S5 vs. S1	S5 vs. NC5	S5 vs. S1
ENSGALG00000011918	ENSGALT00000019444	CCDC134	-2.10635	-2.15722	0.00263063	0.0100806
ENSGALG00000029169	ENSGALT00000043711	HHEX	-1.99772	-2.20125	0.00725858	0.0118928
ENSGALG00000025926	ENSGALT00000043820	MZB1	-2.91699	-2.84325	0.00351044	0.0316894

## Sheet: up_shared DEG(371)
Up-regulated differentially expressed genes (DEG) (N = 371)
gene id	transcript id	gene associated name	Fold change		FDR
			S5 vs. NC5	S5 vs. R1	S5 vs. NC5	S5 vs. R5
ENSGALG00000000177	ENSGALT00000000233	KLF3	3.13546	2.01276	0.000664204	0.0476089
ENSGALG00000000530	ENSGALT00000000731	NOVEL	4.45867	2.48683	0.000446805	0.0392273
ENSGALG00000000667	ENSGALT00000000942	EDN2	3.70912	2.3123	0.00110231	0.0470112
ENSGALG00000000674	ENSGALT00000000956	MYO1D	3.32057	2.36117	0.00219311	0.0398375
ENSGALG00000000771	ENSGALT00000001117	PLA2G15	5.0284	3.54656	0.002752	0.0268595
ENSGALG00000000906	ENSGALT00000001330	RALGPS1	4.24899	2.93204	0.000378463	0.0106605
ENSGALG00000000947	ENSGALT00000001398	FKBP51	2.83701	2.11441	0.00150023	0.0344608
ENSGALG00000001527	ENSGALT00000002321	VWA1	1.99243	1.78867	0.0102716	0.0481111
ENSGALG00000001536	ENSGALT00000002335	NOVEL	4.99671	3.45623	0.00112269	0.0166831
ENSGALG00000001574	ENSGALT00000002392	MLLT6	2.12737	1.86057	0.00485819	0.0344608
ENSGALG00000001620	ENSGALT00000002476	CUTA	4.10467	2.54393	0.00132042	0.0428003
ENSGALG00000001629	ENSGALT00000002490	NA	3.3652	3.13215	0.00147002	0.00428996
ENSGALG00000001694	ENSGALT00000002596	NOVEL	3.94597	2.32158	0.000552096	0.0412072
ENSGALG00000001875	ENSGALT00000002910	TNFRSF4	5.31836	3.17015	0.000888826	0.0262921
ENSGALG00000002108	ENSGALT00000003290	NOVEL	8.49869	3.54405	0.000109004	0.0200099
ENSGALG00000002201	ENSGALT00000003446	PPL	4.16156	2.6802	0.000534348	0.0224676
ENSGALG00000002258	ENSGALT00000003541	NA	2.05297	2.70348	0.0499737	0.0137564
ENSGALG00000002260	ENSGALT00000003543	CISH	4.61065	3.1491	0.00520563	0.0472624
ENSGALG00000002283	ENSGALT00000003585	MAPKAPK3	3.74864	2.34372	0.000580786	0.0339294
ENSGALG00000002375	ENSGALT00000003754	NOTCH1	3.86045	2.46497	0.00111151	0.039309
ENSGALG00000002389	ENSGALT00000003760	ITGB4	4.08292	2.61036	0.0015227	0.0416138
ENSGALG00000002452	ENSGALT00000003868	AQP3	3.02244	2.91757	0.00335428	0.00809336
ENSGALG00000002496	ENSGALT00000003930	LL	20.911	23.7003	0.00145804	0.001036
ENSGALG00000002543	ENSGALT00000004014	CSGALNACT2	2.26368	1.9702	0.00263063	0.0224982
ENSGALG00000002576	ENSGALT00000004043	CRYD2	3.22315	2.43857	0.00170272	0.0262921
ENSGALG00000002750	ENSGALT00000004344	NCKAP1	2.27811	1.93178	0.00346757	0.0325163
ENSGALG00000002831	ENSGALT00000004469	SH3PXD2B	8.62369	3.73608	0.000275037	0.0268595
ENSGALG00000002852	ENSGALT00000004496	NOVEL	3.23141	2.06018	0.000498953	0.0412072
ENSGALG00000002991	ENSGALT00000004734	ARID5B	3.71896	2.79489	0.00111151	0.015606
ENSGALG00000003026	ENSGALT00000004784	MKL2	2.77529	1.95435	0.0013833	0.0495051
ENSGALG00000003144	ENSGALT00000004971	TRIM25	3.91292	3.47555	0.00717956	0.0234575
ENSGALG00000003261	ENSGALT00000005163	PTRF	3.19268	2.14179	0.000413282	0.0273502
ENSGALG00000003282	ENSGALT00000005191	Stat5	1.59615	1.58892	0.0272563	0.0476089
ENSGALG00000003336	ENSGALT00000005279	DAPK2	7.17989	3.64089	0.000287508	0.017039
ENSGALG00000003353	ENSGALT00000005305	RAI14	4.29859	3.01396	0.00520563	0.0476089
ENSGALG00000003374	ENSGALT00000005333	ESRP2	3.74749	2.26934	0.000160984	0.0247339
ENSGALG00000003527	ENSGALT00000005581	ARRDC2	2.56506	2.69378	0.00993435	0.0131741
ENSGALG00000003560	ENSGALT00000005637	SLC6A2	3.09587	3.50222	0.0184468	0.0196356
ENSGALG00000003678	ENSGALT00000005829	GLUL	4.79698	2.7009	0.000221145	0.0228575
ENSGALG00000003748	ENSGALT00000005949	ANO5	2.42034	1.76636	0.000424475	0.0339294
ENSGALG00000003775	ENSGALT00000005988	RICTOR	3.05062	2.06919	0.000256163	0.0243169
ENSGALG00000004060	ENSGALT00000006461	RGS9	2.6089	2.21271	0.00909842	0.0476089
ENSGALG00000004140	ENSGALT00000006583	SH3BP4	3.40486	2.66922	0.00817571	0.0484557
ENSGALG00000004216	ENSGALT00000006703	TOR3A	5.7848	3.17535	0.00113069	0.0365246
ENSGALG00000004260	ENSGALT00000006774	PKP3	5.5577	3.35545	0.000386306	0.0141879
ENSGALG00000004267	ENSGALT00000006784	SIGIRR	3.86214	2.62671	0.00150023	0.0314699
ENSGALG00000004294	ENSGALT00000006837	CGNL1	5.54166	3.2393	0.00111521	0.0310525
ENSGALG00000004300	ENSGALT00000006852	PTDSS2	3.62759	2.35558	0.000144538	0.0149419
ENSGALG00000004306	ENSGALT00000006859	SYT12	3.20582	2.95344	0.0148149	0.0364338
ENSGALG00000004369	ENSGALT00000006970	PYGO1	3.08683	4.26182	0.0327461	0.0142422
ENSGALG00000004481	ENSGALT00000007137	EDA	4.28445	2.87713	0.000104068	0.00508282
ENSGALG00000004519	ENSGALT00000007195	TRPV2	2.71815	2.04724	0.00289686	0.0476121
ENSGALG00000004596	ENSGALT00000007313	AR	5.60609	2.81126	4.07569e-05	0.0145244
ENSGALG00000004760	ENSGALT00000007595	TMEM116	2.92978	2.13221	0.00281962	0.0493667
ENSGALG00000004814	ENSGALT00000007686	RHPN2	2.81426	1.94374	0.000963311	0.0457923
ENSGALG00000004827	ENSGALT00000007713	NOVEL	7.252	4.27558	0.00125741	0.022019
ENSGALG00000004859	ENSGALT00000007763	ZNFX1	2.4045	1.82977	0.000807206	0.030876
ENSGALG00000004860	ENSGALT00000007764	RASD1	2.8764	2.94043	0.0202705	0.030389
ENSGALG00000005035	ENSGALT00000008074	KAT6B	3.47814	2.20307	0.000236197	0.0262921
ENSGALG00000005209	ENSGALT00000008364	AQP1	7.55661	4.35293	0.00166994	0.0273502
ENSGALG00000005272	ENSGALT00000008459	CDH5	3.22059	2.39815	0.00247731	0.035535
ENSGALG00000005379	ENSGALT00000008642	NOVEL	5.24402	2.9728	0.000819789	0.0302783
ENSGALG00000005430	ENSGALT00000008721	ALS2CL	4.80057	2.59721	0.000161276	0.0257687
ENSGALG00000005549	ENSGALT00000008901	CUEDC1	3.22776	2.65082	0.00744422	0.0392273
ENSGALG00000005601	ENSGALT00000008986	NOVEL	4.32735	2.99886	0.00412134	0.0439397
ENSGALG00000005676	ENSGALT00000009103	TTC28	3.98922	2.73596	0.00395356	0.0485411
ENSGALG00000005808	ENSGALT00000009327	KREMEN1	4.43119	3.13851	0.00455202	0.041103
ENSGALG00000005850	ENSGALT00000009401	FNBP1L	2.32758	1.77661	0.000844596	0.0339316
ENSGALG00000005886	ENSGALT00000009462	WSCD1	2.95299	2.61381	0.0153716	0.0475201
ENSGALG00000005956	ENSGALT00000009577	NA	3.22479	2.42132	0.000316855	0.00913533
ENSGALG00000005969	ENSGALT00000009598	ANTXRL	3.42898	2.84397	0.00765328	0.0364338
ENSGALG00000006003	ENSGALT00000009661	NA	3.37399	2.77002	0.00405166	0.026147
ENSGALG00000006008	ENSGALT00000009667	HOMER2	2.83759	3.17673	0.0247191	0.0235494
ENSGALG00000006106	ENSGALT00000009858	NA	4.87347	3.45981	0.000220284	0.00374447
ENSGALG00000006245	ENSGALT00000010098	KLF15	10.5332	4.64373	3.31023e-05	0.00407126
ENSGALG00000006323	ENSGALT00000010224	LECT2	15.4688	21.9753	0.00586643	0.0033767
ENSGALG00000006358	ENSGALT00000010276	TMEM86A	5.93666	5.45673	0.0194855	0.0396838
ENSGALG00000006384	ENSGALT00000010311	NOVEL	5.98681	4.38301	0.00120279	0.0106784
ENSGALG00000006407	ENSGALT00000010345	NA	4.5358	2.55026	0.000368285	0.0310525
ENSGALG00000006412	ENSGALT00000010350	VGLL1	5.61365	4.23408	0.00142197	0.0106605
ENSGALG00000006413	ENSGALT00000010352	CEMIP	17.8815	6.86053	0.00018411	0.009022
ENSGALG00000021017	ENSGALT00000010407	DUSP15	4.56964	2.89659	0.00104804	0.0265744
ENSGALG00000006494	ENSGALT00000010494	GRAMD1B	2.8909	2.34493	0.002234	0.0228048
ENSGALG00000006503	ENSGALT00000010508	VDAC1	4.00166	3.18872	0.000397571	0.00356681
ENSGALG00000006526	ENSGALT00000010550	PLXNB1	4.91093	3.61125	0.00285913	0.0234575
ENSGALG00000006562	ENSGALT00000010594	MCF2	3.51879	2.88755	0.00727768	0.0364338
ENSGALG00000006647	ENSGALT00000010751	DUSP8	3.73927	3.49216	0.00755586	0.019548
ENSGALG00000006655	ENSGALT00000010764	MAP3K13	4.45057	2.46268	0.000771676	0.0481064
ENSGALG00000006706	ENSGALT00000010845	USP6NL	1.83504	1.89337	0.0144154	0.0207779
ENSGALG00000006726	ENSGALT00000010882	GATA3	3.19383	2.77754	0.0092091	0.0348845
ENSGALG00000006783	ENSGALT00000010972	PLOD2	2.45362	1.99173	0.00162747	0.0261879
ENSGALG00000006805	ENSGALT00000011008	NOVEL	2.13752	1.98741	0.00443133	0.0194129
ENSGALG00000006889	ENSGALT00000011158	TMC7	4.63791	2.63563	0.000125567	0.0189274
ENSGALG00000006942	ENSGALT00000011250	PIK3IP1	2.112	1.76633	0.00368646	0.0439397
ENSGALG00000007011	ENSGALT00000011346	ZBTB16	16.6368	6.11775	8.13328e-05	0.00728121
ENSGALG00000007028	ENSGALT00000011371	NOVEL	4.92267	5.74336	0.0106502	0.0110869
ENSGALG00000007039	ENSGALT00000011398	IGF-I	5.26396	3.88958	0.000220284	0.00219281
ENSGALG00000007050	ENSGALT00000011421	NOVEL	4.34884	3.04188	0.00373998	0.0392273
ENSGALG00000007126	ENSGALT00000011543	AFF4	2.75638	2.21731	0.00642299	0.0481111
ENSGALG00000007254	ENSGALT00000011742	ARHGAP12	3.27394	2.38764	0.00389898	0.0481111
ENSGALG00000007304	ENSGALT00000011823	DNMBP	3.37115	2.123	0.000653638	0.0442619
ENSGALG00000007331	ENSGALT00000011863	SVIL	2.54259	1.77621	0.000259984	0.0344608
ENSGALG00000007570	ENSGALT00000012241	NA	3.32113	1.9847	0.000272443	0.0475136
ENSGALG00000007698	ENSGALT00000012474	CARD8	2.95366	2.16587	0.0021953	0.0417737
ENSGALG00000007717	ENSGALT00000012508	GCNT7	4.29701	2.49739	0.00134388	0.0488877
ENSGALG00000007755	ENSGALT00000012575	KIAA2022	5.64428	3.15045	0.00166994	0.0423015
ENSGALG00000007796	ENSGALT00000012644	BCAS1	3.39929	2.37776	0.00245817	0.0450177
ENSGALG00000007808	ENSGALT00000012666	HID1	3.00296	2.21275	0.00316874	0.0478159
ENSGALG00000007912	ENSGALT00000012849	ATP9A	6.16883	3.15152	0.000386306	0.0269178
ENSGALG00000007920	ENSGALT00000012861	PRR5L	8.28408	4.2077	0.000879055	0.0254613
ENSGALG00000008011	ENSGALT00000013002	SLC25A19	2.76384	2.24643	0.00753651	0.0486879
ENSGALG00000008014	ENSGALT00000013006	CEBPB	2.43837	2.47233	0.0313215	0.0463185
ENSGALG00000008040	ENSGALT00000013047	NOVEL	6.7327	3.21603	0.000275037	0.0273421
ENSGALG00000008057	ENSGALT00000013074	LLGL2	3.12063	1.97722	6.1769e-05	0.0218257
ENSGALG00000008166	ENSGALT00000013275	TLR15	2.15287	1.86525	0.00764971	0.0476089
ENSGALG00000008240	ENSGALT00000013409	CFLAR	1.70724	1.67148	0.024766	0.0498552
ENSGALG00000008457	ENSGALT00000013781	RIN2	2.30607	1.80984	0.000406885	0.0194129
ENSGALG00000008466	ENSGALT00000013797	FAM117B	3.89025	3.54831	0.00734316	0.0218257
ENSGALG00000008479	ENSGALT00000013817	PLEKHM3	4.79752	3.37433	0.00324984	0.030876
ENSGALG00000008546	ENSGALT00000013922	FGD5	4.69207	2.79134	0.000580786	0.0273421
ENSGALG00000008632	ENSGALT00000014068	ACSS1	2.52957	2.53778	0.0334755	0.0499992
ENSGALG00000008669	ENSGALT00000014115	CD28	27.8134	16.6956	0.000125567	0.000466009
ENSGALG00000008701	ENSGALT00000014160	XDH	9.70717	2.52139	1.04198e-10	0.0102428
ENSGALG00000008786	ENSGALT00000014289	NBEAL1	3.59806	2.20734	0.000516049	0.0405582
ENSGALG00000008818	ENSGALT00000014333	IDH1	2.12726	1.86975	0.00374253	0.0276905
ENSGALG00000008842	ENSGALT00000014370	PIKFYVE	2.85073	2.32093	0.00783546	0.0483131
ENSGALG00000008855	ENSGALT00000014386	UGP2	2.6496	2.19172	0.00399611	0.0338263
ENSGALG00000008886	ENSGALT00000014440	ZNF618	7.05038	3.29039	0.00059719	0.0385152
ENSGALG00000008890	ENSGALT00000014453	ADGRL4	5.24777	2.99702	0.000248448	0.0189274
ENSGALG00000008911	ENSGALT00000014492	RNF208	3.92616	5.48748	0.0270312	0.012583
ENSGALG00000008953	ENSGALT00000014559	AASS	2.86126	2.22548	0.00347725	0.0400045
ENSGALG00000009017	ENSGALT00000014669	STEAP2	6.3003	4.2555	0.00225495	0.0223379
ENSGALG00000009020	ENSGALT00000014678	JAG1	4.30719	2.63674	0.000976702	0.0364338
ENSGALG00000009028	ENSGALT00000014689	BTBD3	6.03057	4.31418	0.00303854	0.0228048
ENSGALG00000009192	ENSGALT00000014971	SLITRK2	5.1736	2.83664	0.000391845	0.0273502
ENSGALG00000009396	ENSGALT00000015306	CAV2	2.54894	2.16012	0.00422794	0.0302783
ENSGALG00000009445	ENSGALT00000015375	INPP5F	3.68199	2.57293	0.00116645	0.0268595
ENSGALG00000009479	ENSGALT00000015431	NOVEL	5.60414	6.51361	0.000976702	0.000307098
ENSGALG00000009562	ENSGALT00000015569	PLEK2	4.58137	3.0275	0.00030582	0.0110136
ENSGALG00000009700	ENSGALT00000015790	PDK4	40.6385	6.72099	6.94238e-08	0.00223952
ENSGALG00000009781	ENSGALT00000015908	DOCK1	2.98974	2.09405	0.00128984	0.0425318
ENSGALG00000009784	ENSGALT00000015916	PTPN14	6.0833	4.58887	0.00513236	0.0262921
ENSGALG00000009866	ENSGALT00000016041	CAMK1D	4.8901	3.36315	0.000958036	0.0153365
ENSGALG00000009885	ENSGALT00000016069	HELB	2.74486	1.84872	0.000315467	0.0389382
ENSGALG00000010031	ENSGALT00000016293	ARHGAP10	2.83151	2.33978	0.00731655	0.044188
ENSGALG00000010051	ENSGALT00000016332	MOCS1	5.52512	2.89326	0.000716646	0.0398501
ENSGALG00000010125	ENSGALT00000016467	CSGALNACT1	7.03637	3.17177	0.000580786	0.0439397
ENSGALG00000010152	ENSGALT00000016502	TSPAN8	2.73246	2.62496	0.00914198	0.0225397
ENSGALG00000010163	ENSGALT00000016526	LGR5	5.86426	4.36222	0.00115755	0.00874538
ENSGALG00000010352	ENSGALT00000016857	ARHGEF26	5.55764	3.35904	9.54059e-05	0.00585957
ENSGALG00000010363	ENSGALT00000016878	HERC3	4.17017	2.58285	5.63465e-05	0.00809336
ENSGALG00000010371	ENSGALT00000016897	FAM13A	8.87428	5.06139	0.000258156	0.00661561
ENSGALG00000010412	ENSGALT00000016952	WWTR1	3.55782	2.79533	0.00727768	0.0438434
ENSGALG00000010476	ENSGALT00000017059	BNIP3	1.9047	2.04888	0.0163395	0.015606
ENSGALG00000010628	ENSGALT00000017294	ACSL1	3.10925	2.19033	0.00113069	0.0344608
ENSGALG00000010668	ENSGALT00000017356	WWC2	3.90322	2.83992	0.00479219	0.0436077
ENSGALG00000010746	ENSGALT00000017484	TMEM59	2.01309	1.83809	0.00358539	0.0218257
ENSGALG00000010795	ENSGALT00000017557	ISPD	3.48866	2.59138	0.00285913	0.0335482
ENSGALG00000010811	ENSGALT00000017577	LGMN	2.22405	2.01109	0.00636164	0.0295355
ENSGALG00000010866	ENSGALT00000017665	AREG	4.97717	6.27859	0.00261437	0.000993022
ENSGALG00000010910	ENSGALT00000017745	RAPGEF5	2.28244	1.74889	0.00134065	0.0450177
ENSGALG00000010960	ENSGALT00000017839	GALNT3	5.30581	3.41798	0.000256163	0.00809336
ENSGALG00000010987	ENSGALT00000017897	LYST	2.83705	2.04256	0.000241898	0.0176017
ENSGALG00000011045	ENSGALT00000017992	AFF1	5.63386	3.96712	0.000976702	0.0110869
ENSGALG00000011068	ENSGALT00000018021	COBLL1	4.24845	2.72815	0.00179132	0.0409283
ENSGALG00000011071	ENSGALT00000018029	CLMN	8.5017	3.7754	0.00112708	0.0466323
ENSGALG00000011089	ENSGALT00000018067	IFIH1	2.65707	2.13172	0.00299647	0.034249
ENSGALG00000011132	ENSGALT00000018146	RBMS1	2.65405	2.05645	0.00394563	0.0484557
ENSGALG00000011136	ENSGALT00000018152	CAPN9	5.09228	4.50125	0.010053	0.0262921
ENSGALG00000011141	ENSGALT00000018170	ITGB6	6.89176	4.05017	0.00274506	0.0375983
ENSGALG00000011153	ENSGALT00000018187	LY75	4.57525	2.56919	7.78553e-05	0.017039
ENSGALG00000011235	ENSGALT00000018324	GALNT15	6.96411	3.08296	0.000148097	0.0268595
ENSGALG00000011238	ENSGALT00000018328	WLS	2.74423	2.31656	0.00120127	0.0114438
ENSGALG00000011256	ENSGALT00000018367	WDFY3	3.13234	2.09873	0.000116267	0.0166831
ENSGALG00000011278	ENSGALT00000018402	KAT2B	3.18356	2.24534	0.000751963	0.0262921
ENSGALG00000011406	ENSGALT00000018613	NTN4	5.29754	2.87609	0.000109004	0.0150838
ENSGALG00000011436	ENSGALT00000018650	TMBIM1	1.74536	1.70643	0.0223737	0.0470112
ENSGALG00000011481	ENSGALT00000018718	GPD1L	1.6648	1.7852	0.0258717	0.0224982
ENSGALG00000011499	ENSGALT00000018738	SCARB2	2.53085	2.08039	0.00299218	0.030876
ENSGALG00000011605	ENSGALT00000018952	EPB41L5	3.42856	2.41795	0.00220039	0.0397742
ENSGALG00000011633	ENSGALT00000019001	SLC5A8	13.2334	4.13849	0.000146639	0.0273502
ENSGALG00000011639	ENSGALT00000019018	CEP170B	4.00227	2.44658	0.000620796	0.0344608
ENSGALG00000011664	ENSGALT00000019068	RASSF6	5.73525	3.50875	0.0016514	0.0302783
ENSGALG00000011686	ENSGALT00000019105	SEMA5B	3.8546	3.02592	0.00449954	0.0296496
ENSGALG00000011744	ENSGALT00000019179	KALRN	2.98912	2.16264	0.002234	0.0442619
ENSGALG00000011861	ENSGALT00000019349	SYT16	5.5408	4.2821	0.005283	0.0262921
ENSGALG00000011885	ENSGALT00000019391	ANXA5	1.96017	1.66839	0.0021295	0.0322813
ENSGALG00000011894	ENSGALT00000019412	CYP2D6	2.12008	2.06272	0.00558221	0.0147724
ENSGALG00000011982	ENSGALT00000019550	PDE5A	5.74299	3.15022	0.000514803	0.0265744
ENSGALG00000012057	ENSGALT00000019695	TRANK1	3.58493	2.69499	4.6325e-05	0.00123884
ENSGALG00000012061	ENSGALT00000019704	NOVEL	5.65838	4.55856	0.00710046	0.0268595
ENSGALG00000012074	ENSGALT00000019725	ALPK1	4.36164	2.8358	0.000398733	0.0156391
ENSGALG00000012111	ENSGALT00000019784	TMEM37	9.6389	5.7313	0.000406958	0.00631362
ENSGALG00000012124	ENSGALT00000019806	PELI2	2.63225	2.78231	0.0327885	0.0404417
ENSGALG00000012279	ENSGALT00000020066	FBXO30	2.34446	1.77868	0.00055496	0.0284687
ENSGALG00000012370	ENSGALT00000020197	C3H6ORF72	2.26429	1.92314	0.00132016	0.0180834
ENSGALG00000012416	ENSGALT00000020297	NOVEL	4.67252	2.78958	0.00105058	0.0344608
ENSGALG00000012561	ENSGALT00000020513	PKP4	2.33494	1.73194	0.000176059	0.0224982
ENSGALG00000012610	ENSGALT00000020588	CTSL2	3.09685	2.37514	0.000220284	0.0061845
ENSGALG00000012763	ENSGALT00000020826	GNPTAB	4.14283	3.16491	0.00107389	0.0113475
ENSGALG00000012801	ENSGALT00000020885	LY86	6.72046	6.93632	0.00316167	0.00407126
ENSGALG00000019553	ENSGALT00000020990	SERPINB10	15.7846	8.67326	7.21021e-05	0.000830315
ENSGALG00000012885	ENSGALT00000021014	BCL2	4.86542	2.94021	0.000386306	0.0194367
ENSGALG00000012954	ENSGALT00000021128	MYO10	3.55673	2.60428	0.00144475	0.0251299
ENSGALG00000019543	ENSGALT00000021151	OTULIN	5.42616	3.69876	0.00130485	0.0176444
ENSGALG00000012979	ENSGALT00000021178	TRIO	3.4775	2.2869	0.000748922	0.0339294
ENSGALG00000013134	ENSGALT00000021439	PLEKHA5	3.79716	2.11025	5.59088e-05	0.0273502
ENSGALG00000013211	ENSGALT00000021583	ST8SIA1	3.62793	3.11907	0.00510855	0.0224676
ENSGALG00000013521	ENSGALT00000022020	TBC1D1	1.95023	1.66224	0.00298686	0.0395372
ENSGALG00000013754	ENSGALT00000022346	PLAGL1	3.15021	2.81048	0.00790134	0.0275257
ENSGALG00000013846	ENSGALT00000022465	ARFGEF3	5.03614	3.69462	0.0010779	0.0112294
ENSGALG00000013861	ENSGALT00000022483	TNFAIP3	2.97215	1.99818	0.000976702	0.0480241
ENSGALG00000013890	ENSGALT00000022520	MC5R	5.20561	4.83899	0.0100172	0.0236646
ENSGALG00000013902	ENSGALT00000022540	PTPRM	3.34034	2.33102	0.00109565	0.0302783
ENSGALG00000013941	ENSGALT00000022595	PDE7B	4.85417	2.98787	0.000323069	0.015606
ENSGALG00000014074	ENSGALT00000022788	CPEB4	3.17599	2.71777	0.00839638	0.0356
ENSGALG00000014262	ENSGALT00000023068	APBB2	5.99165	3.7206	0.000707202	0.0156391
ENSGALG00000014372	ENSGALT00000023222	SLC34A2	9.45732	6.65278	0.00552442	0.0262921
ENSGALG00000022926	ENSGALT00000023388	GPR162	2.89762	3.42024	0.0373716	0.0281029
ENSGALG00000014627	ENSGALT00000023578	FRMD4B	2.96415	2.21818	0.00259475	0.0403513
ENSGALG00000014716	ENSGALT00000023728	gp130	3.51011	2.88847	0.0116161	0.0481111
ENSGALG00000014783	ENSGALT00000023856	PTPRK	2.28861	1.914	0.00642299	0.0493951
ENSGALG00000014786	ENSGALT00000023868	PIK3R1	2.83611	1.98453	0.000596859	0.0337006
ENSGALG00000014821	ENSGALT00000023928	THEMIS	11.025	5.30869	0.00131465	0.0273502
ENSGALG00000014855	ENSGALT00000023973	GHR	3.2526	2.548	0.00242227	0.0257687
ENSGALG00000014923	ENSGALT00000024069	ARHGEF28	3.27141	2.39958	0.002426	0.0364821
ENSGALG00000014930	ENSGALT00000024082	ENC1	7.00026	3.89505	0.000677486	0.020284
ENSGALG00000014944	ENSGALT00000024107	GCNT4	5.99526	3.38345	0.00107552	0.0310525
ENSGALG00000015026	ENSGALT00000024233	TRAF3IP2	2.2711	1.9923	0.00764971	0.0405994
ENSGALG00000015056	ENSGALT00000024287	LAMA3	2.97867	2.00054	0.000460013	0.0356
ENSGALG00000015083	ENSGALT00000024332	DENND4C	4.93011	2.84734	3.53117e-05	0.00705327
ENSGALG00000015096	ENSGALT00000024358	SH3GL2	4.32852	3.12108	0.00291166	0.0284687
ENSGALG00000015109	ENSGALT00000024377	TJP2	2.75158	2.18137	0.00080307	0.0150838
ENSGALG00000015140	ENSGALT00000024430	NOVEL	6.03302	3.56155	0.0020348	0.0364338
ENSGALG00000015209	ENSGALT00000024541	NFIL3	5.53196	4.05009	0.000100095	0.001036
ENSGALG00000015235	ENSGALT00000024585	scyc1	2.81601	4.77721	0.0469264	0.00728121
ENSGALG00000015250	ENSGALT00000024605	PCMTD1	2.64686	2.35069	8.89882e-05	0.000470876
ENSGALG00000015256	ENSGALT00000024619	PAM	2.74559	2.09364	0.000879055	0.0225572
ENSGALG00000015263	ENSGALT00000024632	TMEM30C	6.10097	3.47934	0.00262445	0.0452564
ENSGALG00000015286	ENSGALT00000024673	SESN1	2.16076	1.7069	0.000729817	0.0284687
ENSGALG00000015297	ENSGALT00000024687	FOXO3	3.81627	3.05499	0.00249713	0.0189274
ENSGALG00000015333	ENSGALT00000024747	PCGF3	6.3323	3.5936	0.000608919	0.0213847
ENSGALG00000015428	ENSGALT00000024886	PSD3	5.80301	3.77732	0.000741246	0.0127569
ENSGALG00000015433	ENSGALT00000024891	ABCA1	7.77066	5.49703	0.000890363	0.00668943
ENSGALG00000015487	ENSGALT00000024975	GJA5	3.7585	2.71681	0.00165053	0.0257687
ENSGALG00000015504	ENSGALT00000024999	TTPA	5.23306	3.34309	0.00182203	0.0287465
ENSGALG00000015598	ENSGALT00000025150	RASGRF2	2.80294	2.71364	0.0094523	0.0221937
ENSGALG00000015626	ENSGALT00000025195	RGS12	3.07085	2.63351	0.00338677	0.0199841
ENSGALG00000015665	ENSGALT00000025262	SH3BP2	2.09427	1.63004	0.000890363	0.0412072
ENSGALG00000015675	ENSGALT00000025277	NOVEL	3.57322	2.17733	0.000406885	0.0389382
ENSGALG00000015681	ENSGALT00000025294	NRIP1	4.16194	3.35426	0.00140927	0.0106867
ENSGALG00000015788	ENSGALT00000025459	CHMP4C	4.03083	2.59426	0.000516049	0.0228575
ENSGALG00000015795	ENSGALT00000025470	ADAMTS5	8.70068	3.69298	0.000664204	0.0398375
ENSGALG00000015828	ENSGALT00000025518	BACH1	3.17351	2.63651	0.00507705	0.029755
ENSGALG00000015969	ENSGALT00000025731	FAM135A	2.5591	2.26579	0.0094494	0.0393352
ENSGALG00000016017	ENSGALT00000025803	SLC4A11	9.17274	5.11366	0.000398733	0.00821598
ENSGALG00000016055	ENSGALT00000025868	KCNJ15	5.62043	3.37488	0.000250396	0.0112294
ENSGALG00000016059	ENSGALT00000025873	ETS2	5.71442	3.5846	6.54617e-05	0.00300516
ENSGALG00000016123	ENSGALT00000025974	TRPS1	4.33458	3.08114	0.00571695	0.0457923
ENSGALG00000016164	ENSGALT00000026046	ABCG1	3.06022	3.38039	0.0222113	0.0234575
ENSGALG00000016216	ENSGALT00000026140	NDRG1	4.53371	2.60255	6.06529e-06	0.00409887
ENSGALG00000016227	ENSGALT00000026167	GPR34	5.40036	3.6465	0.000179586	0.00401974
ENSGALG00000016234	ENSGALT00000026176	SLA	2.40603	2.43808	0.00422794	0.00721801
ENSGALG00000016266	ENSGALT00000026229	PRRG1	6.64397	4.91795	0.00297688	0.0180196
ENSGALG00000016304	ENSGALT00000026304	LRRC1	4.76554	3.68164	0.000548942	0.00460522
ENSGALG00000016333	ENSGALT00000026348	MTSS1	4.01775	3.45217	0.00105058	0.00474777
ENSGALG00000016361	ENSGALT00000026392	FAM110C	27.4583	5.6028	0.000221145	0.0284365
ENSGALG00000016369	ENSGALT00000026404	FBXO32	2.26468	1.79975	0.000275037	0.0142479
ENSGALG00000016399	ENSGALT00000026449	SNTB1	2.30528	2.04121	0.00587882	0.0314699
ENSGALG00000016456	ENSGALT00000026552	Lpin1	3.95503	2.95466	6.34174e-05	0.00123884
ENSGALG00000016556	ENSGALT00000026715	NOVEL	2.41769	2.70723	0.0474457	0.0422894
ENSGALG00000016572	ENSGALT00000026748	NOVEL	2.81064	2.11926	0.00300555	0.0457923
ENSGALG00000016611	ENSGALT00000026810	WWC3	3.18198	2.17487	0.000457204	0.0262921
ENSGALG00000016614	ENSGALT00000026815	SHROOM2	2.99215	2.0206	0.000264215	0.0268595
ENSGALG00000016639	ENSGALT00000026863	KIF13B	2.29858	1.92307	0.00241969	0.0276905
ENSGALG00000016651	ENSGALT00000026878	NA	7.08178	4.68881	0.00476613	0.0339294
ENSGALG00000016752	ENSGALT00000027049	INPP4A	3.53688	2.70847	0.00534037	0.0416138
ENSGALG00000016761	ENSGALT00000027063	LYG2	6.39447	8.15042	0.00596857	0.00351793
ENSGALG00000016783	ENSGALT00000027100	IL1R1	8.70427	2.8652	6.54617e-05	0.0463154
ENSGALG00000016829	ENSGALT00000027170	LAMP1	2.59281	2.23518	0.00799902	0.0405582
ENSGALG00000016839	ENSGALT00000027194	NOVEL	4.1705	4.38333	0.0159729	0.0224982
ENSGALG00000016920	ENSGALT00000027355	LMO7	4.94237	2.81195	0.000409792	0.0268595
ENSGALG00000017086	ENSGALT00000027604	MTUS2	3.8386	3.3409	0.013217	0.0398375
ENSGALG00000017389	ENSGALT00000028076	SIX4	7.40264	4.01214	0.000706928	0.021155
ENSGALG00000017274	ENSGALT00000030043	CD9	2.49618	2.56048	0.0325494	0.0442619
ENSGALG00000016114	ENSGALT00000030811	TNFRSF11B	2.07019	1.99121	0.0202733	0.0457923
ENSGALG00000015525	ENSGALT00000030889	SGK3	2.55799	1.7966	0.000833559	0.0493951
ENSGALG00000011882	ENSGALT00000031134	CDCP1	5.14463	3.11195	0.00299118	0.0493951
ENSGALG00000011291	ENSGALT00000031164	REV-ERBb	2.9918	2.13553	0.00114115	0.0349856
ENSGALG00000016669	ENSGALT00000031540	GAL2	10.5635	31.3996	0.0229385	0.00398999
ENSGALG00000022817	ENSGALT00000031541	GAL7	21.2567	51.6261	0.0122211	0.00508282
ENSGALG00000019961	ENSGALT00000031763	C6ORF192	3.00034	2.59897	0.0141063	0.0481111
ENSGALG00000013971	ENSGALT00000031766	SGK1	3.58765	2.25147	4.07569e-05	0.0110869
ENSGALG00000010769	ENSGALT00000032201	HPGD	4.09791	2.4952	0.00125741	0.046063
ENSGALG00000011356	ENSGALT00000032905	ERICH3	2.91312	2.85393	0.0283775	0.0475201
ENSGALG00000020768	ENSGALT00000033279	EVX2	7.396	2.7973	0.000236197	0.0481111
ENSGALG00000006038	ENSGALT00000033354	TGFBR3	3.13972	2.13996	0.00119509	0.0439058
ENSGALG00000020899	ENSGALT00000033528	NOVEL	7.36339	4.23422	0.00105058	0.0217493
ENSGALG00000021074	ENSGALT00000033904	MYOC	5.3405	3.40166	0.00441366	0.044188
ENSGALG00000021171	ENSGALT00000034089	NA	7.39331	3.62116	0.000241898	0.0194129
ENSGALG00000003970	ENSGALT00000034518	TJP1	3.39236	2.29493	0.00064713	0.0273502
ENSGALG00000021395	ENSGALT00000034529	NOVEL	3.07293	2.37664	0.00412707	0.041103
ENSGALG00000005693	ENSGALT00000034669	INOS	2.22878	1.77435	0.00281114	0.0484557
ENSGALG00000022557	ENSGALT00000036134	cldn3	2.60659	2.80882	0.0286644	0.0312964
ENSGALG00000005332	ENSGALT00000036264	CACNA1D	4.67694	3.30821	0.00180182	0.0224676
ENSGALG00000016959	ENSGALT00000036496	DGKH	3.6078	3.37505	0.013743	0.0326684
ENSGALG00000016926	ENSGALT00000036508	KLF12	3.42104	4.25705	0.0229224	0.0152319
ENSGALG00000022788	ENSGALT00000036620	NIPAL2	7.13516	3.8879	0.00270281	0.044188
ENSGALG00000016543	ENSGALT00000036628	NHS	6.50661	2.7716	3.1326e-05	0.0225952
ENSGALG00000015926	ENSGALT00000036630	RUNX1T1	3.15791	2.18216	0.00159543	0.0442619
ENSGALG00000015869	ENSGALT00000036640	WWP1	3.11817	2.15475	0.000976702	0.0356618
ENSGALG00000016173	ENSGALT00000036706	UBASH3A	3.52798	3.68739	0.026675	0.0358769
ENSGALG00000016157	ENSGALT00000036707	UMODL1	5.22044	3.44306	0.00562698	0.0488877
ENSGALG00000022857	ENSGALT00000036824	NOVEL	2.44717	2.2512	0.0150624	0.0443121
ENSGALG00000022871	ENSGALT00000036897	HHLA2	5.53101	3.50147	0.00125741	0.0234575
ENSGALG00000012802	ENSGALT00000037229	F13A1	16.5662	11.0315	2.60971e-06	1.24834e-05
ENSGALG00000022985	ENSGALT00000037308	PPAR	4.65431	3.05692	0.000275037	0.0102265
ENSGALG00000012021	ENSGALT00000037347	NA	5.16118	2.81397	0.000194732	0.0213847
ENSGALG00000014913	ENSGALT00000037359	ROS1	11.9111	3.67888	1.17085e-05	0.017039
ENSGALG00000012363	ENSGALT00000037413	EGFR	3.6742	2.23167	0.000643027	0.0442619
ENSGALG00000023025	ENSGALT00000037442	ZBTB42	8.1054	3.8094	0.000391925	0.0224676
ENSGALG00000023068	ENSGALT00000037573	NOVEL	9.34019	4.11403	0.000378463	0.0215968
ENSGALG00000023089	ENSGALT00000037654	SSBP2	3.77001	3.23037	0.00277997	0.0134238
ENSGALG00000011298	ENSGALT00000037748	RARB	3.2734	2.4574	0.00507356	0.0481064
ENSGALG00000009495	ENSGALT00000038732	FGFR2	2.60356	1.96701	0.000806608	0.0265744
ENSGALG00000023475	ENSGALT00000038854	NOVEL	4.42576	4.14155	0.0101573	0.0245032
ENSGALG00000008323	ENSGALT00000039147	COL17A1	2.10688	1.9811	0.019387	0.0498552
ENSGALG00000003446	ENSGALT00000039164	PRLR	7.30253	3.21408	0.000740845	0.0470112
ENSGALG00000023576	ENSGALT00000039200	PIM3	2.61184	1.82948	0.000380636	0.03504
ENSGALG00000006775	ENSGALT00000039224	TGM2	2.71302	2.25508	0.00220821	0.0218257
ENSGALG00000003137	ENSGALT00000039587	FAM101A	10.4704	8.03762	0.00111151	0.00378102
ENSGALG00000008439	ENSGALT00000039749	CD36	8.08652	6.85018	0.000275037	0.000587568
ENSGALG00000023812	ENSGALT00000039902	CCNI2	3.76772	2.8761	0.00832744	0.0498552
ENSGALG00000023872	ENSGALT00000040078	FAM129B	3.97726	2.8571	0.00220039	0.0282291
ENSGALG00000023876	ENSGALT00000040107	PRKCQ	2.5826	2.57537	0.0280494	0.0457923
ENSGALG00000001405	ENSGALT00000040280	IRF6	2.47726	2.14694	0.00316167	0.0225989
ENSGALG00000024011	ENSGALT00000040488	Ex-FABP	3.85085	3.86896	0.00415731	0.00721801
ENSGALG00000024248	ENSGALT00000040932	NA	3.39322	3.91301	0.0358218	0.0325163
ENSGALG00000003135	ENSGALT00000041033	chAnk3	5.05964	2.78727	0.00113109	0.0476089
ENSGALG00000026192	ENSGALT00000042657	ST8SIA4	2.44902	2.02308	0.00325635	0.0339294
ENSGALG00000025738	ENSGALT00000042798	RHOU	5.72692	2.87405	0.000144459	0.0228048
ENSGALG00000027757	ENSGALT00000043011	ARL4A	1.89425	1.76568	0.0134177	0.0458769
ENSGALG00000025887	ENSGALT00000043027	ATF3	2.50962	3.06558	0.036272	0.0223379
ENSGALG00000026702	ENSGALT00000043093	TCEA3	3.5588	3.09898	0.0045925	0.0194367
ENSGALG00000026896	ENSGALT00000043173	NA	3.41787	2.7585	0.0103301	0.0476089
ENSGALG00000028174	ENSGALT00000043222	PRKCDBP	2.18956	1.71399	0.00127449	0.0412072
ENSGALG00000026370	ENSGALT00000043258	NOVEL	6.32492	4.17684	0.0070878	0.0460299
ENSGALG00000026422	ENSGALT00000043260	NA	2.86181	2.34908	0.00137163	0.0156391
ENSGALG00000026663	ENSGALT00000043370	CX3CL1	2.12765	2.00811	0.00767275	0.0255249
ENSGALG00000026180	ENSGALT00000043501	MSX2	3.5622	2.65677	0.00151897	0.0224676
ENSGALG00000027269	ENSGALT00000043628	GUCA2B	3.71667	6.4093	0.046653	0.0112423
ENSGALG00000026119	ENSGALT00000043791	MN1	3.04493	2.79107	0.0209089	0.0484557
ENSGALG00000027627	ENSGALT00000043888	RIL	1.84532	1.8588	0.0249279	0.0398375
ENSGALG00000026184	ENSGALT00000044030	CREG1	2.48889	1.96413	0.00141843	0.0287465
ENSGALG00000027207	ENSGALT00000044370	NA	3.6728	3.16045	0.0015208	0.00798221
ENSGALG00000027334	ENSGALT00000044387	NA	2.1978	1.9807	0.000188684	0.00126581
ENSGALG00000026246	ENSGALT00000044565	GIF	2.90326	2.81191	0.0279644	0.0493951
ENSGALG00000026499	ENSGALT00000044635	TNFRSF25	3.35678	3.6295	0.0283392	0.0332724
ENSGALG00000026862	ENSGALT00000044685	CLDN1	5.00097	3.7894	0.000976702	0.00821598
ENSGALG00000026364	ENSGALT00000044806	ASAH1	2.02907	2.14236	0.0435886	0.0477616
ENSGALG00000028570	ENSGALT00000044844	C6orf132	4.35472	2.84108	0.00353174	0.0485411
ENSGALG00000026426	ENSGALT00000044887	OTUD1	2.00706	2.21097	0.00771392	0.00471047
ENSGALG00000028709	ENSGALT00000044995	RNF144A	2.15998	1.99607	0.0160201	0.0481797
ENSGALG00000027514	ENSGALT00000045041	SCEL	4.46519	3.27915	0.00495876	0.0356004
ENSGALG00000027494	ENSGALT00000045151	SPTSSB	2.69342	2.78088	0.030853	0.0416138
ENSGALG00000027737	ENSGALT00000045171	CIDEA	6.23548	5.7365	0.00115492	0.0021791
ENSGALG00000026834	ENSGALT00000045342	PPAP2C	2.77178	2.28083	0.00652661	0.0431898
ENSGALG00000028341	ENSGALT00000045496	MADCAM1	2.57389	2.55361	0.00434839	0.0087143
ENSGALG00000027602	ENSGALT00000045730	NOVEL	4.34668	2.51581	0.00114343	0.0481111
ENSGALG00000027243	ENSGALT00000045854	EXPH5	5.10286	3.19436	0.00136499	0.0273502
ENSGALG00000029120	ENSGALT00000046047	SLC5A3	2.98785	2.16523	0.00114277	0.0312964

## Sheet: down_shared DEG(275)
Down-regulated differentially expressed genes (DEG) (N = 275)
gene id	transcript id	gene associated name	Fold change		FDR
			S5 vs. NC5	S5 vs. R5	S5 vs. NC5	S5 vs. R5
ENSGALG00000000137	ENSGALT00000000190	SNRPE	-2.05597	-1.70332	0.002426	0.0471801
ENSGALG00000000169	ENSGALT00000000225	PCNA	-1.87696	-1.66317	0.00463247	0.0439397
ENSGALG00000000241	ENSGALT00000000320	STARD4	-2.80869	-2.14739	7.26166e-08	0.000202971
ENSGALG00000000272	ENSGALT00000000355	CDCA2	-1.86508	-1.57363	0.00142673	0.0398375
ENSGALG00000000372	ENSGALT00000000504	HMGN2	-2.73563	-2.21481	0.0015227	0.0268595
ENSGALG00000000516	ENSGALT00000000705	FANCA	-1.97688	-1.74242	0.00457308	0.0421005
ENSGALG00000000675	ENSGALT00000000957	CTPS1	-2.52783	-1.7989	6.8462e-05	0.0225572
ENSGALG00000000707	ENSGALT00000001001	PSMD7	-2.15281	-1.75487	0.00245594	0.0483131
ENSGALG00000000791	ENSGALT00000001149	NA	-2.12355	-1.81339	0.000639564	0.0150838
ENSGALG00000000802	ENSGALT00000001163	DHODH	-2.35786	-1.86681	0.00107305	0.0339294
ENSGALG00000000814	ENSGALT00000001185	HNRNPR	-2.28492	-1.71853	0.00032354	0.0343957
ENSGALG00000001295	ENSGALT00000001977	SCLY	-3.92342	-3.12819	0.002234	0.0255249
ENSGALG00000001298	ENSGALT00000001980	RFC2	-2.30392	-1.84609	0.0011376	0.0339294
ENSGALG00000001373	ENSGALT00000002093	TRAF3IP3	-3.25343	-2.3316	0.000125567	0.0122342
ENSGALG00000001506	ENSGALT00000002291	PTTG1	-2.97353	-2.14412	9.27258e-05	0.012583
ENSGALG00000001529	ENSGALT00000002324	THYN1	-2.42764	-2.00038	0.00346757	0.044188
ENSGALG00000001542	ENSGALT00000002342	MRPL20	-2.45866	-1.9482	0.00112269	0.0314699
ENSGALG00000001555	ENSGALT00000002364	AURKAIP1	-2.43283	-1.93098	0.00211471	0.044188
ENSGALG00000001559	ENSGALT00000002370	ZP3	-20.1281	-9.64033	1.63161e-06	0.000470876
ENSGALG00000001586	ENSGALT00000002409	NEIL1	-2.54825	-2.11399	0.00220039	0.0302757
ENSGALG00000001587	ENSGALT00000002410	MRPL40	-2.73732	-2.13049	0.00279167	0.0473943
ENSGALG00000001602	ENSGALT00000002429	NUTF2	-2.51574	-1.97672	0.000744655	0.026147
ENSGALG00000001790	ENSGALT00000002759	NA	-2.32923	-2.00029	0.00277997	0.0302757
ENSGALG00000002005	ENSGALT00000003121	NA	-2.16425	-1.84655	0.00162927	0.0268595
ENSGALG00000002030	ENSGALT00000003157	AHCY	-2.02032	-1.64384	0.00104804	0.0385189
ENSGALG00000002045	ENSGALT00000003180	EIF2B	-1.8257	-1.54777	0.00151074	0.0412072
ENSGALG00000002064	ENSGALT00000003212	STOML2	-2.39941	-1.82515	0.00126022	0.0481111
ENSGALG00000002070	ENSGALT00000003221	SAP130	-1.91435	-1.81074	0.00788201	0.0328238
ENSGALG00000002095	ENSGALT00000003268	CHMP4B	-2.0926	-1.80855	0.00316167	0.0365246
ENSGALG00000002531	ENSGALT00000003987	SF3B3	-2.37594	-2.0882	0.00299781	0.0262921
ENSGALG00000002624	ENSGALT00000004133	BMS1	-1.53357	-1.61332	0.0347152	0.0364338
ENSGALG00000002681	ENSGALT00000004223	HSD17B7	-3.87974	-2.66777	7.61457e-06	0.00217252
ENSGALG00000002701	ENSGALT00000004257	DNAJC9	-2.03978	-1.77739	0.00299218	0.0344608
ENSGALG00000002881	ENSGALT00000004543	C26H6ORF125	-2.97982	-2.12789	0.0011421	0.0457923
ENSGALG00000002899	ENSGALT00000004577	AACS	-2.70701	-2.00677	2.73042e-06	0.0020473
ENSGALG00000002948	ENSGALT00000004660	TXNL1	-2.28409	-1.7796	0.000566517	0.0306542
ENSGALG00000003084	ENSGALT00000004875	NUDT21	-2.01175	-1.68001	0.00176216	0.0398375
ENSGALG00000003085	ENSGALT00000004876	CDK1	-3.09852	-2.25812	0.000284764	0.0195457
ENSGALG00000003122	ENSGALT00000004936	ZFAND2A	-3.53095	-2.39282	0.00116645	0.046577
ENSGALG00000003210	ENSGALT00000005085	SURF6	-2.60239	-1.95952	0.000890363	0.0364338
ENSGALG00000005870	ENSGALT00000005468	NA	-1.73645	-1.63503	0.0113093	0.0470112
ENSGALG00000003484	ENSGALT00000005512	BARD1	-2.27484	-1.76326	0.00059719	0.0339294
ENSGALG00000003503	ENSGALT00000005541	MYBL2	-2.39395	-1.80736	0.000592549	0.0364338
ENSGALG00000003578	ENSGALT00000005664	fn1	-2.60501	-2.69927	0.00291139	0.00562034
ENSGALG00000024076	ENSGALT00000005734	FEN1	-2.30453	-2.05094	0.000241898	0.00318925
ENSGALG00000003630	ENSGALT00000005753	C5H11ORF10	-3.06931	-2.0859	0.000890366	0.0498231
ENSGALG00000003681	ENSGALT00000005832	TOP1	-3.29303	-2.46259	0.00106327	0.0273502
ENSGALG00000003881	ENSGALT00000006172	ERCC6L	-1.69408	-1.64744	0.00733028	0.0255249
ENSGALG00000004023	ENSGALT00000006406	E2F8	-1.9055	-1.61638	0.000716646	0.0236372
ENSGALG00000004039	ENSGALT00000006431	MINOS1	-2.53373	-2.0132	0.002234	0.0421143
ENSGALG00000004106	ENSGALT00000006531	DHCR7	-3.05577	-2.46791	2.92393e-05	0.001036
ENSGALG00000004161	ENSGALT00000006616	CCNB2	-2.22833	-1.79001	0.000901545	0.0304859
ENSGALG00000004184	ENSGALT00000006650	SPARC	-2.88911	-2.70682	0.000469706	0.00216301
ENSGALG00000004195	ENSGALT00000006667	KIF4A	-2.25935	-1.93542	0.000391845	0.00874538
ENSGALG00000004687	ENSGALT00000007467	CENPP	-2.5286	-1.84844	0.000275037	0.0308065
ENSGALG00000004698	ENSGALT00000007484	PDAP1	-1.86042	-1.62002	0.00289472	0.0405994
ENSGALG00000004714	ENSGALT00000007510	CPSF4	-1.9409	-1.64889	0.00159226	0.0349126
ENSGALG00000004767	ENSGALT00000007603	ODF2	-1.83055	-1.67598	0.00226374	0.0215968
ENSGALG00000004809	ENSGALT00000007678	PPIF	-1.97304	-1.7508	0.00113069	0.016713
ENSGALG00000004834	ENSGALT00000007721	COPS3	-1.96821	-1.62726	0.00127811	0.0398375
ENSGALG00000004874	ENSGALT00000007781	PPIH	-2.6789	-1.95575	0.00064713	0.0370905
ENSGALG00000004954	ENSGALT00000007944	DUT	-2.3932	-2.04548	0.000158446	0.00385549
ENSGALG00000005064	ENSGALT00000008119	PRPSAP2	-1.71011	-1.52791	0.00483071	0.0481797
ENSGALG00000005236	ENSGALT00000008412	FARSB	-2.20189	-1.82242	0.000440764	0.0163687
ENSGALG00000005254	ENSGALT00000008438	NOVEL	-2.31193	-2.15723	0.00460283	0.0225989
ENSGALG00000005293	ENSGALT00000008486	GNG13	-4.02308	-3.4471	0.0106727	0.0481111
ENSGALG00000005309	ENSGALT00000008512	TKT	-1.8481	-1.67257	0.00742631	0.0476089
ENSGALG00000005328	ENSGALT00000008548	IBA57	-1.82287	-1.62664	0.00444748	0.0422287
ENSGALG00000005507	ENSGALT00000008838	NONO	-1.91857	-1.62981	0.00305899	0.0485411
ENSGALG00000005535	ENSGALT00000008880	TCOF1	-2.64299	-2.07809	0.00236975	0.0438678
ENSGALG00000005887	ENSGALT00000009463	PXDNL	-2.82139	-3.72318	0.0238631	0.0113117
ENSGALG00000005951	ENSGALT00000009569	NA	-2.29344	-2.21093	0.00716231	0.0243169
ENSGALG00000005961	ENSGALT00000009585	dAK	-2.4123	-1.92222	0.000453371	0.0198668
ENSGALG00000005980	ENSGALT00000009619	NA	-2.06449	-1.72323	0.000731509	0.0228575
ENSGALG00000006110	ENSGALT00000009864	PLK1	-1.89828	-1.67607	0.00148426	0.0233666
ENSGALG00000006132	ENSGALT00000009895	MOSPD1	-2.05702	-1.66178	0.00128984	0.044188
ENSGALG00000006160	ENSGALT00000009947	HNRNPA0	-2.30417	-1.82382	0.00113348	0.0369062
ENSGALG00000006198	ENSGALT00000010002	LSS	-3.28582	-2.66597	9.95523e-05	0.00238117
ENSGALG00000006271	ENSGALT00000010135	RACGAP1	-1.79231	-1.57597	0.0028856	0.0398375
ENSGALG00000008538	ENSGALT00000010139	GINS1	-3.11477	-2.59664	0.000125567	0.00223952
ENSGALG00000006500	ENSGALT00000010502	NDE1	-2.03982	-1.65928	0.000641166	0.0288156
ENSGALG00000006566	ENSGALT00000010599	TBCCD1	-1.88492	-1.71489	0.00723301	0.044188
ENSGALG00000006576	ENSGALT00000010624	GRM3	-3.5958	-3.41732	0.0141063	0.0421143
ENSGALG00000006643	ENSGALT00000010732	HSPA14	-1.9044	-1.65399	0.00145359	0.0273502
ENSGALG00000006723	ENSGALT00000010875	NA	-6.57139	-4.14592	5.76618e-09	2.1699e-05
ENSGALG00000006809	ENSGALT00000011012	chOBF-1	-1.91536	-1.69902	0.00625617	0.0483131
ENSGALG00000006973	ENSGALT00000011296	BLNK	-2.29108	-2.00165	0.002426	0.0254613
ENSGALG00000007008	ENSGALT00000011343	POLR3E	-1.99531	-1.76614	0.00587882	0.0457923
ENSGALG00000007035	ENSGALT00000011381	NA	-2.48541	-2.13881	0.00455202	0.0372687
ENSGALG00000007131	ENSGALT00000011553	NOVEL	-2.12383	-1.74102	0.00120279	0.0343464
ENSGALG00000007153	ENSGALT00000011588	NA	-2.17128	-1.70524	0.00112269	0.0457923
ENSGALG00000007158	ENSGALT00000011595	SOCS1	-2.20587	-1.85563	0.00452673	0.0496599
ENSGALG00000007170	ENSGALT00000011612	SNRPA1	-2.54219	-1.88501	0.000700593	0.0392993
ENSGALG00000007205	ENSGALT00000011661	COX6A1	-3.06207	-2.23326	0.00164412	0.0457923
ENSGALG00000007237	ENSGALT00000011710	ALYREF	-2.43426	-1.89294	0.000248448	0.0183084
ENSGALG00000007250	ENSGALT00000011732	SNRB'	-2.64736	-1.97855	0.000370618	0.0251299
ENSGALG00000007314	ENSGALT00000011835	DSCAML1	-4.39668	-2.59675	0.000460013	0.044188
ENSGALG00000007665	ENSGALT00000012422	POLE	-2.02565	-1.78701	0.00100482	0.0152319
ENSGALG00000007686	ENSGALT00000012459	TRAP1	-2.00354	-1.59659	0.000546211	0.0364338
ENSGALG00000007704	ENSGALT00000012485	NPM3	-3.22207	-2.1948	0.000534348	0.0369062
ENSGALG00000007705	ENSGALT00000012486	NCL	-2.66447	-2.08931	0.000248448	0.012583
ENSGALG00000007879	ENSGALT00000012797	FANCL	-2.20557	-1.68079	0.00018411	0.0268595
ENSGALG00000008054	ENSGALT00000013068	NOVEL	-2.16028	-1.84772	0.000890363	0.0176444
ENSGALG00000008066	ENSGALT00000013095	UQCR10	-2.8969	-2.40643	0.00279201	0.029656
ENSGALG00000008084	ENSGALT00000013121	NDUFS3	-2.28791	-1.83999	0.00242227	0.0476089
ENSGALG00000008233	ENSGALT00000013400	BUB1	-1.78597	-1.62178	0.00587932	0.0434393
ENSGALG00000008249	ENSGALT00000013428	DNAJC2	-2.22358	-1.76452	0.00105058	0.0375983
ENSGALG00000008389	ENSGALT00000013668	VBP1	-1.76959	-1.59963	0.00538526	0.0437346
ENSGALG00000008574	ENSGALT00000013965	CLNS1A	-2.06256	-1.70473	0.00140422	0.0369062
ENSGALG00000008675	ENSGALT00000014121	SLC25A5	-2.28679	-1.811	0.00112269	0.0370905
ENSGALG00000008703	ENSGALT00000014162	RFC4	-2.55311	-1.8737	3.31023e-05	0.0109297
ENSGALG00000008720	ENSGALT00000014189	RSU1	-1.64971	-1.57984	0.0145148	0.0481111
ENSGALG00000008722	ENSGALT00000014191	MCOLN2	-1.89547	-1.86995	0.0209119	0.0466323
ENSGALG00000008798	ENSGALT00000014303	ZMYND19	-2.81741	-2.00182	0.000252448	0.0273502
ENSGALG00000008963	ENSGALT00000014574	DBF4	-1.77319	-1.56481	0.00303491	0.0405582
ENSGALG00000028529	ENSGALT00000014675	PTGDS	-5.29069	-3.20426	2.92393e-05	0.00626054
ENSGALG00000009045	ENSGALT00000014724	EBNA1BP2	-2.17319	-1.76061	0.00105058	0.0332724
ENSGALG00000009070	ENSGALT00000014762	HSPE1	-2.29725	-1.73015	0.000916558	0.0488877
ENSGALG00000009093	ENSGALT00000014804	PNO1	-2.76763	-2.1103	0.000635866	0.0251299
ENSGALG00000009110	ENSGALT00000014836	LSM8	-2.91472	-2.10399	0.00107062	0.0429775
ENSGALG00000009241	ENSGALT00000015038	SFRP2	-2.36661	-2.01568	0.000143301	0.00378102
ENSGALG00000009286	ENSGALT00000015106	ATP5G3	-2.4364	-1.93338	0.00163384	0.0395372
ENSGALG00000009365	ENSGALT00000015253	CYP51A1	-5.67043	-3.89759	8.11541e-09	1.73508e-05
ENSGALG00000009448	ENSGALT00000015379	IFRD1	-2.18384	-1.79282	0.000420157	0.0180834
ENSGALG00000009560	ENSGALT00000015566	MSMO1	-3.30248	-2.35883	3.31023e-05	0.00547616
ENSGALG00000009641	ENSGALT00000015703	COL1A2	-2.06309	-2.88447	0.0414931	0.00821598
ENSGALG00000009668	ENSGALT00000015738	C4orf27	-2.26606	-1.78939	0.000124127	0.012583
ENSGALG00000009733	ENSGALT00000015842	SHFM1	-2.86084	-2.11093	0.000664204	0.0299066
ENSGALG00000009971	ENSGALT00000016208	CDC20	-2.91288	-2.26755	0.000256163	0.0112294
ENSGALG00000010093	ENSGALT00000016417	BRMS1L	-1.72045	-1.55249	0.00498935	0.0442619
ENSGALG00000010120	ENSGALT00000016462	KIF2C	-1.72476	-1.60233	0.00448741	0.0297833
ENSGALG00000010153	ENSGALT00000016503	CYP21A2	-3.94081	-2.68544	0.00170272	0.046063
ENSGALG00000010175	ENSGALT00000016542	HSP90AB1	-2.36394	-1.92809	0.000241898	0.0110869
ENSGALG00000010255	ENSGALT00000016679	NASP	-2.69504	-2.23011	0.000534348	0.0112294
ENSGALG00000010265	ENSGALT00000016699	E2F7	-2.35932	-1.81907	0.000228464	0.0211808
ENSGALG00000010331	ENSGALT00000016815	MME	-2.09519	-1.69677	0.00200092	0.0488877
ENSGALG00000010478	ENSGALT00000017063	STIL	-1.72202	-1.60903	0.00946205	0.0457923
ENSGALG00000010490	ENSGALT00000017082	DPYSL4	-2.54421	-1.97405	0.00107305	0.0339294
ENSGALG00000010689	ENSGALT00000017388	MAGOH2	-1.79928	-1.63644	0.00699331	0.0458769
ENSGALG00000010700	ENSGALT00000017404	RPA3	-2.19659	-1.84548	0.00111797	0.0240376
ENSGALG00000010745	ENSGALT00000017483	HMGB2	-2.36387	-1.86128	0.000677486	0.0273502
ENSGALG00000010798	ENSGALT00000017560	DHCR24	-4.55528	-3.06812	3.58616e-07	0.000371514
ENSGALG00000010829	ENSGALT00000017607	CDCA7	-2.05784	-1.88888	0.00163384	0.0134238
ENSGALG00000010900	ENSGALT00000017724	SPC25	-2.79251	-2.05345	6.69966e-05	0.0108557
ENSGALG00000010942	ENSGALT00000017807	NUPL2	-2.19629	-1.76019	0.00140075	0.0422894
ENSGALG00000011020	ENSGALT00000017955	Protein	-2.08627	-1.70454	0.000754493	0.027888
ENSGALG00000011138	ENSGALT00000018166	CCNK	-2.10546	-1.70104	0.000560896	0.0268595
ENSGALG00000011165	ENSGALT00000018201	SEC31A	-2.3135	-1.96222	0.00278789	0.0339294
ENSGALG00000011184	ENSGALT00000018234	HNRNPD	-1.91792	-1.65322	0.00300555	0.0435073
ENSGALG00000011372	ENSGALT00000018551	CINP	-2.74261	-2.02345	0.00130425	0.0470112
ENSGALG00000011409	ENSGALT00000018617	SNRPF	-3.76771	-2.62738	0.000147325	0.0118616
ENSGALG00000011452	ENSGALT00000018675	NOVEL	-1.99183	-1.61898	0.00120279	0.044188
ENSGALG00000011489	ENSGALT00000018726	T	-2.31028	-1.95732	0.00241969	0.0314699
ENSGALG00000011553	ENSGALT00000018842	UTP3	-2.14142	-1.83647	0.00495876	0.0476448
ENSGALG00000011559	ENSGALT00000018851	ACTR6	-2.94154	-2.24613	0.00105058	0.0283177
ENSGALG00000011625	ENSGALT00000018992	MRPL18	-3.11979	-2.12499	0.000250396	0.0287465
ENSGALG00000011659	ENSGALT00000019060	ACAT2	-2.95984	-2.22853	1.04524e-05	0.00195555
ENSGALG00000011842	ENSGALT00000019325	SNRPD1	-3.15564	-2.21342	0.000194732	0.0208306
ENSGALG00000012068	ENSGALT00000019715	ZGRF1	-2.10947	-1.99462	0.00999825	0.0365228
ENSGALG00000012112	ENSGALT00000019785	DBI	-2.89598	-2.04703	0.000146639	0.0215968
ENSGALG00000012448	ENSGALT00000020350	ORC4	-2.42161	-1.83351	0.000544803	0.0339294
ENSGALG00000012546	ENSGALT00000020490	MCM5	-2.4017	-1.91832	0.00026781	0.0145457
ENSGALG00000012628	ENSGALT00000020614	HABP4	-1.87614	-1.70763	0.00406433	0.0311004
ENSGALG00000012915	ENSGALT00000021064	MCM4	-1.95601	-1.7403	0.00214033	0.0246798
ENSGALG00000013018	ENSGALT00000021255	TPRKB	-2.76312	-2.0511	0.00105058	0.039309
ENSGALG00000019019	ENSGALT00000021640	NTRK1	-7.45521	-5.18457	4.3141e-05	0.00162999
ENSGALG00000013384	ENSGALT00000021833	LIG1	-2.39605	-2.01795	0.00111054	0.0199438
ENSGALG00000013457	ENSGALT00000021937	PLEKHO1	-2.37233	-2.08121	0.000809142	0.0105168
ENSGALG00000013747	ENSGALT00000022338	TAGAP	-2.37669	-1.93506	0.000148097	0.00809336
ENSGALG00000013811	ENSGALT00000022417	NCAPH2	-2.07782	-1.72245	0.00211085	0.0428003
ENSGALG00000014121	ENSGALT00000022855	COX5A	-2.70861	-1.88792	0.000528428	0.0469827
ENSGALG00000014439	ENSGALT00000023319	NCAPD2	-2.05036	-1.79644	0.000805903	0.0135526
ENSGALG00000014513	ENSGALT00000023425	CDCA3	-2.67677	-2.04043	0.000290411	0.0191998
ENSGALG00000014573	ENSGALT00000023500	NAT10	-1.88262	-1.64899	0.002234	0.0325163
ENSGALG00000014753	ENSGALT00000023789	CENPK	-2.0318	-1.59077	0.000805903	0.0481111
ENSGALG00000014862	ENSGALT00000023982	HMGCS1	-2.09871	-1.79608	0.000979409	0.020284
ENSGALG00000014901	ENSGALT00000024035	METTL16	-1.87138	-1.60316	0.00120279	0.0299302
ENSGALG00000014920	ENSGALT00000024064	USP14	-1.96476	-1.67653	0.00121326	0.0273502
ENSGALG00000015060	ENSGALT00000024297	METTL24	-2.57352	-1.93641	0.00147002	0.0483131
ENSGALG00000015274	ENSGALT00000024655	TCEA1	-2.07329	-1.83668	0.00127811	0.017039
ENSGALG00000015280	ENSGALT00000024663	MRPL15	-2.1932	-1.76007	0.00101888	0.0344608
ENSGALG00000015484	ENSGALT00000024971	BCL9	-1.59967	-1.85279	0.0479154	0.0223524
ENSGALG00000015792	ENSGALT00000025465	ADAMTS1	-1.7506	-1.76382	0.00557678	0.012583
ENSGALG00000015985	ENSGALT00000025761	CCNE2	-2.29343	-1.96209	0.000343404	0.00809336
ENSGALG00000016331	ENSGALT00000026343	SQLE	-3.85036	-2.82416	3.77018e-06	0.000641835
ENSGALG00000016425	ENSGALT00000026494	IAH1	-2.4928	-1.93659	0.00179654	0.0457923
ENSGALG00000016438	ENSGALT00000026517	MELK	-2.20951	-1.98912	0.00129722	0.0127229
ENSGALG00000016610	ENSGALT00000026809	PTRHD1	-3.38959	-2.96409	0.01039	0.0470112
ENSGALG00000016661	ENSGALT00000026890	BLK	-1.9265	-1.7104	0.00642905	0.0484557
ENSGALG00000016676	ENSGALT00000026909	MCM3	-3.53597	-2.57514	1.41671e-05	0.00199562
ENSGALG00000017033	ENSGALT00000027520	MRPS31	-2.16446	-1.73777	0.00101888	0.0356
ENSGALG00000017064	ENSGALT00000027564	RFC3	-1.95828	-1.71353	0.000250396	0.00723775
ENSGALG00000017384	ENSGALT00000028069	ERH	-1.84571	-1.6583	0.00344848	0.0333474
ENSGALG00000017394	ENSGALT00000028082	INSIG1	-2.34723	-2.08985	0.0021669	0.0194367
ENSGALG00000017396	ENSGALT00000028084	NOVEL	-2.09146	-1.93324	0.0129524	0.0499319
ENSGALG00000018357	ENSGALT00000029077	ND6	-3.9484	-4.73961	0.00465791	0.00454219
ENSGALG00000018360	ENSGALT00000029080	cytb	-3.48625	-3.41074	0.0144914	0.0370905
ENSGALG00000018361	ENSGALT00000029081	ND5	-3.42702	-3.24332	0.0119525	0.0369062
ENSGALG00000018364	ENSGALT00000029084	ND4	-2.92956	-3.41425	0.0328363	0.0343957
ENSGALG00000018367	ENSGALT00000029087	COX3	-4.07425	-3.53152	0.00798372	0.0385152
ENSGALG00000018368	ENSGALT00000029088	ATP6	-3.86382	-3.53049	0.0110571	0.0398375
ENSGALG00000018370	ENSGALT00000029090	Cu	-3.44455	-3.2855	0.0140324	0.0401314
ENSGALG00000018373	ENSGALT00000029093	COX1	-3.38585	-3.74387	0.0190016	0.0275257
ENSGALG00000018382	ENSGALT00000029102	ND1	-3.99499	-3.48087	0.00742406	0.0356889
ENSGALG00000018384	ENSGALT00000029104	NOVEL	-3.33134	-4.2945	0.0022412	0.000587568
ENSGALG00000018386	ENSGALT00000029106	NOVEL	-2.37359	-2.78302	0.0423958	0.0360245
ENSGALG00000000905	ENSGALT00000029152	PSMB4	-2.92322	-1.95548	0.000241898	0.0392273
ENSGALG00000015398	ENSGALT00000030419	NOVEL	-2.05869	-1.79372	0.00539795	0.0471801
ENSGALG00000011738	ENSGALT00000030630	ARHGDIB	-2.41734	-2.30128	0.00715024	0.0262921
ENSGALG00000016107	ENSGALT00000030815	EBAG9	-2.24736	-1.82757	0.00142197	0.0356004
ENSGALG00000019438	ENSGALT00000030816	ENY2	-1.92084	-1.6995	0.00623417	0.049086
ENSGALG00000014854	ENSGALT00000030933	MYL12A	-2.06764	-1.70847	0.00198706	0.0436077
ENSGALG00000019741	ENSGALT00000031350	PSMC3IP	-2.67455	-2.20573	0.00111151	0.0200099
ENSGALG00000007493	ENSGALT00000032336	NSDHL	-3.28214	-2.35979	1.41671e-05	0.00318925
ENSGALG00000011533	ENSGALT00000032496	XRCC3	-2.14479	-1.70961	0.000841572	0.0356
ENSGALG00000014788	ENSGALT00000032863	CENPH	-1.9936	-1.70427	0.00394833	0.0484557
ENSGALG00000007609	ENSGALT00000033235	ARHGAP19	-1.94164	-1.65938	0.00105058	0.0257149
ENSGALG00000020793	ENSGALT00000033324	UBE2E3	-1.77744	-1.61482	0.00530779	0.0405582
ENSGALG00000021136	ENSGALT00000034016	VPREB3	-3.46378	-2.42188	0.000805903	0.0328152
ENSGALG00000021285	ENSGALT00000034317	UNG	-1.83933	-1.60093	0.00350863	0.0463474
ENSGALG00000021526	ENSGALT00000034799	PRR11	-2.17282	-1.91583	0.00209897	0.0225989
ENSGALG00000005090	ENSGALT00000034804	SKA2	-1.83943	-1.73515	0.0127257	0.0471801
ENSGALG00000021717	ENSGALT00000035259	ATP8	-3.5492	-3.4754	0.00726645	0.0224676
ENSGALG00000021719	ENSGALT00000035261	ND4L	-2.81188	-3.44629	0.0214728	0.017039
ENSGALG00000022570	ENSGALT00000036146	NA	-2.89162	-2.09888	0.000797061	0.0356889
ENSGALG00000022661	ENSGALT00000036293	NOVEL	-3.54939	-2.91063	0.000879055	0.0114438
ENSGALG00000017128	ENSGALT00000036444	SKA3	-2.0394	-1.88153	0.00209967	0.0152319
ENSGALG00000017046	ENSGALT00000036466	OSF-2	-2.70145	-1.99127	0.00018411	0.0198668
ENSGALG00000016457	ENSGALT00000036892	TRIB2	-2.10745	-1.72079	0.000514803	0.0230596
ENSGALG00000014887	ENSGALT00000037366	ASF1A	-2.51843	-2.12555	0.000963311	0.0156409
ENSGALG00000012104	ENSGALT00000037497	ANLN	-1.75294	-1.52811	0.00300555	0.0471801
ENSGALG00000013000	ENSGALT00000037507	ADIPOR2	-2.71245	-2.21553	0.00064713	0.0145244
ENSGALG00000010317	ENSGALT00000038044	POLH	-2.16796	-2.12894	0.00386525	0.012583
ENSGALG00000010637	ENSGALT00000038220	SELRC1	-2.26826	-2.11164	0.00600677	0.0273502
ENSGALG00000010356	ENSGALT00000038354	RAD54L	-1.8725	-1.65247	0.00308096	0.0364338
ENSGALG00000009228	ENSGALT00000038829	PARP1	-2.2673	-1.99979	0.000476692	0.00705327
ENSGALG00000002747	ENSGALT00000038914	FASN	-2.77165	-2.3018	0.000398733	0.00821598
ENSGALG00000005708	ENSGALT00000039029	HNF4beta	-3.15333	-2.77473	0.00515139	0.0302757
ENSGALG00000006841	ENSGALT00000039057	POLR2L	-2.55405	-1.95377	0.00131526	0.0422894
ENSGALG00000002563	ENSGALT00000039281	TPM4	-3.91573	-2.89836	6.36995e-05	0.00339247
ENSGALG00000005974	ENSGALT00000039669	COL6A1	-1.77092	-2.25004	0.0323483	0.00653434
ENSGALG00000005243	ENSGALT00000040333	PPP3CB	-2.31722	-2.03475	0.00791706	0.0481111
ENSGALG00000023973	ENSGALT00000040396	NOVEL	-4.06318	-4.55763	0.00358539	0.00528641
ENSGALG00000028409	ENSGALT00000040525	SNRPG	-3.25984	-2.04887	0.000236197	0.044188
ENSGALG00000004245	ENSGALT00000040967	NUDT1	-2.60682	-2.35274	0.000963311	0.00755939
ENSGALG00000001812	ENSGALT00000041255	ATCAY	-2.54771	-2.11836	0.000904749	0.0174378
ENSGALG00000024418	ENSGALT00000041328	NA	-3.14174	-2.26832	0.00158784	0.0457923
ENSGALG00000024481	ENSGALT00000041394	APITD1	-2.22599	-1.8016	0.00189031	0.0436368
ENSGALG00000027754	ENSGALT00000042715	NOVEL	-3.14089	-1.9838	0.000220284	0.0457923
ENSGALG00000026475	ENSGALT00000042873	SLURP1	-10.5369	-3.87241	1.59176e-05	0.0224314
ENSGALG00000026380	ENSGALT00000043007	UBE2C	-4.36725	-2.95523	0.000220284	0.0137564
ENSGALG00000025810	ENSGALT00000043056	CCNB3	-2.67789	-2.00478	0.000363418	0.0234575
ENSGALG00000006267	ENSGALT00000043409	TPX2	-2.71884	-2.20743	0.000248448	0.00809336
ENSGALG00000026871	ENSGALT00000043470	SC5D	-2.98641	-2.17863	0.000192161	0.01673
ENSGALG00000028649	ENSGALT00000043583	NA	-3.19345	-2.54362	0.00346757	0.0393352
ENSGALG00000003045	ENSGALT00000043768	E2F1	-3.05773	-2.10066	0.00045133	0.0364338
ENSGALG00000026795	ENSGALT00000044014	KIAA0040	-2.19941	-1.85709	0.00300555	0.0398375
ENSGALG00000000533	ENSGALT00000044272	SRSF3	-2.43001	-1.90164	0.00130485	0.0394878
ENSGALG00000010995	ENSGALT00000044324	ITGB3BP	-1.8686	-1.77519	0.00928856	0.035742
ENSGALG00000027156	ENSGALT00000044335	PSMA7	-2.17449	-1.76226	0.0022847	0.0481111
ENSGALG00000026480	ENSGALT00000044340	NOVEL	-2.92415	-2.35929	0.00422794	0.0450177
ENSGALG00000029135	ENSGALT00000044371	GAS41	-2.15235	-1.91406	0.00256603	0.0243169
ENSGALG00000028358	ENSGALT00000044511	NUDT16L1	-2.34307	-1.7038	0.000418163	0.0471801
ENSGALG00000025937	ENSGALT00000044559	FXYD6	-2.52921	-2.05726	0.000408174	0.0131741
ENSGALG00000025751	ENSGALT00000044647	NMRK2	-3.04634	-1.87734	2.21133e-05	0.0275257
ENSGALG00000025941	ENSGALT00000044662	RGS20	-2.84776	-2.58391	0.000148097	0.001036
ENSGALG00000028641	ENSGALT00000044704	DJ-1	-1.88161	-1.62848	0.00370254	0.0476089
ENSGALG00000027331	ENSGALT00000044873	COLCA2	-4.98266	-2.71184	0.000236197	0.0398375
ENSGALG00000026081	ENSGALT00000045333	RBM38	-2.368	-2.14601	0.000976702	0.00809336
ENSGALG00000028470	ENSGALT00000045388	GSR	-2.33522	-2.30726	0.00358539	0.0110869
ENSGALG00000028026	ENSGALT00000045576	NDUFS4	-2.47109	-1.88422	0.00120279	0.044188
ENSGALG00000027454	ENSGALT00000045695	CENPW	-2.40767	-1.7878	0.000125567	0.0224676
ENSGALG00000027067	ENSGALT00000045767	C1QTNF1	-2.42823	-2.62661	0.0093525	0.0127569
ENSGALG00000027492	ENSGALT00000045846	C14orf80	-1.93915	-1.8289	0.00289864	0.0164151
ENSGALG00000014496	ENSGALT00000046234	PROM1	-2.33501	-2.14018	0.00498968	0.0268595

## Sheet: up_unique DEG(21)
Up-regulated differentially expressed genes (DEG) (N = 21)
gene id	transcript id	gene associated name	Fold change	FDR
			S5 vs. R5	S5 vs. R5
ENSGALG00000000081	ENSGALT00000000109	IL4I1	4.28925	0.0112294
ENSGALG00000001091	ENSGALT00000001635	C1orf116	2.52366	0.0457923
ENSGALG00000005204	ENSGALT00000008355	NA	2.50321	0.0478166
ENSGALG00000005937	ENSGALT00000009555	NOVEL	2.04887	0.0233305
ENSGALG00000006192	ENSGALT00000009990	USH1C	3.27514	0.0427924
ENSGALG00000006354	ENSGALT00000010271	GAL3ST2	2.5238	0.0442619
ENSGALG00000007125	ENSGALT00000011542	PARD3	2.5828	0.0455138
ENSGALG00000026622	ENSGALT00000045452	NA	1.83278	0.0224982
ENSGALG00000011684	ENSGALT00000019102	STAP1	3.27539	0.0268595
ENSGALG00000012321	ENSGALT00000020133	MAP4K5	1.83068	0.0422894
ENSGALG00000012390	ENSGALT00000020231	PPP1R14C	3.77562	0.044188
ENSGALG00000012965	ENSGALT00000021150	FAM105A	2.8149	0.0134238
ENSGALG00000015138	ENSGALT00000024427	TMEM2	2.87117	0.0269178
ENSGALG00000017056	ENSGALT00000027553	DCLK1	4.08249	0.0498231
ENSGALG00000018767	ENSGALT00000029643	NOVEL	5.7347	0.0112294
ENSGALG00000022815	ENSGALT00000036713	GAL1	15.6471	0.00807851
ENSGALG00000023517	ENSGALT00000039021	AGPAT2	2.12151	0.0476089
ENSGALG00000025695	ENSGALT00000042608	SCARNA13	4.09631	0.0371525
ENSGALG00000019283	ENSGALT00000043431	NOVEL	3.80415	0.0271207
ENSGALG00000025744	ENSGALT00000044813	NA	3.44088	0.0280629
ENSGALG00000026525	ENSGALT00000046059	EBP	4.52613	0.0442619

## Sheet: down_unique DEG(12)
Down-regulated differentially expressed genes (DEG) (N = 12)
gene id	transcript id	gene associated name	Fold change	FDR
			S5 vs. R5	S5 vs. R5
ENSGALG00000003283	ENSGALT00000005192	COMP	-2.41247	0.0184301
ENSGALG00000004670	ENSGALT00000007442	ATRIP	-1.68881	0.0439397
ENSGALG00000004960	ENSGALT00000007955	FBN1	-1.74971	0.0450177
ENSGALG00000005551	ENSGALT00000008904	DKK3	-1.91447	0.0339294
ENSGALG00000007888	ENSGALT00000012809	VRK2	-2.03313	0.0339294
ENSGALG00000011271	ENSGALT00000018392	LUM	-2.7	0.0403318
ENSGALG00000011970	ENSGALT00000019527	CHADL	-2.43283	0.0481064
ENSGALG00000014501	ENSGALT00000023412	FGFBP2	-2.42977	0.0392273
ENSGALG00000015914	ENSGALT00000026445	CALB1	-2.01394	0.0481111
ENSGALG00000003316	ENSGALT00000033855	FMO3	-3.61675	0.0339294
ENSGALG00000028564	ENSGALT00000042648	GRP	-4.883	0.0134238
ENSGALG00000000919	ENSGALT00000001353	PIGR	-2.96	0.0112294

## Sheet: up_unique DEG(13)
Up-regulated differentially expressed genes (DEG) (N = 13)
gene id	transcript id	gene associated name	Fold change	FDR
			S5 vs. S1	S5 vs. S1
ENSGALG00000000780	ENSGALT00000001131	SMPD3	3.49581	0.0467796
ENSGALG00000024340	ENSGALT00000009998	NA	11.19	0.0347574
ENSGALG00000007392	ENSGALT00000011955	ADAMTS9	2.6435	0.0386113
ENSGALG00000007786	ENSGALT00000012627	DOK5	5.36342	0.0327868
ENSGALG00000009867	ENSGALT00000016042	WIF1	8.75339	0.0327868
ENSGALG00000010448	ENSGALT00000017012	LTBP1	2.25819	0.000458285
ENSGALG00000011883	ENSGALT00000019389	CLEC3B	1.9541	0.0281213
ENSGALG00000014908	ENSGALT00000024043	FST	2.51514	0.0420046
ENSGALG00000015001	ENSGALT00000024193	LAMA4	1.95804	0.0243956
ENSGALG00000015624	ENSGALT00000025190	VCAN	3.92103	0.0117453
ENSGALG00000016220	ENSGALT00000026149	WISP1	2.76369	0.0420046
ENSGALG00000018401	ENSGALT00000029130	NA	13.1466	0.0186494
ENSGALG00000015148	ENSGALT00000032821	ANXA1	2.51116	0.0268164

[truncated: 2 more sheets: up_unique DEG(1296), down_unique DEG(1139)]
