# Supplementary material for: Novel Pathways Revealed in Bursa of Fabricius Transcriptome in Response to Extraintestinal Pathogenic Escherichia coli (ExPEC) Infection
Source: PLoS One. 2015 Nov 10;10(11):e0142570. doi: 10.1371/journal.pone.0142570 (PMC4640532; doi:10.1371/journal.pone.0142570)
Supplement: S3 Table — (XLSX) [file pone.0142570.s003.xlsx]

## Sheet: up DEGs in S5 vs. NC5
Up-regulated differentilly expressed genes (DEGs) in the contrast of susceptible vs. non-challenged birds at day 5
gga04210: Apoptosis	Ensembl Gene ID	Ensembl Transcript ID	Associated Gene Name	Fold change	FDR
	ENSGALG00000008240	ENSGALT00000013409	CFLAR	1.70724	0.024766
	ENSGALG00000009014	ENSGALT00000014665	TRAF2	1.82265	0.0366521
	ENSGALG00000012518	ENSGALT00000020448	NOVEL	2.11543	0.0414234
	ENSGALG00000014786	ENSGALT00000023868	PIK3R1	2.83611	0.000596859
	ENSGALG00000014890	ENSGALT00000024021	TNFRSF1A	2.35164	0.00299218
	ENSGALG00000016783	ENSGALT00000027100	IL1R1	8.70427	6.54617e-05
	ENSGALG00000017205	ENSGALT00000027811	ENDOD1	4.04104	0.0361215
	ENSGALG00000010709	ENSGALT00000031871	AKT3	2.18704	0.0387055
	ENSGALG00000008569	ENSGALT00000032642	CHP1	1.5219	0.0445497
	ENSGALG00000011620	ENSGALT00000037443	AKT1	1.88692	0.0263956
	ENSGALG00000006351	ENSGALT00000039919	FAS	1.74429	0.0334867
	ENSGALG00000010638	ENSGALT00000045406	CASP3	1.96595	0.00559515
gga04060: Cytokine-cytokine receptor interaction	ENSGALG00000002003	ENSGALT00000003119	BMPR1A	6.08163	0.00223335
	ENSGALG00000002112	ENSGALT00000003300	CSF3R	2.83	0.0257989
	ENSGALG00000003733	ENSGALT00000005924	LIFR	6.41607	0.00277997
	ENSGALG00000003747	ENSGALT00000005943	OSMR	3.40686	0.00130561
	ENSGALG00000004221	ENSGALT00000006712	IL22RA1	2.05696	0.0402419
	ENSGALG00000004419	ENSGALT00000007041	TNFRSF1B	1.87504	0.0176285
	ENSGALG00000005802	ENSGALT00000009188	FLT4	3.678	0.0238959
	ENSGALG00000006032	ENSGALT00000009711	IL13RA1	3.75189	0.000875155
	ENSGALG00000006106	ENSGALT00000009858	TNFRSF6B	4.87347	0.000220284
	ENSGALG00000007874	ENSGALT00000012787	IL18	2.7078	0.00800646
	ENSGALG00000008459	ENSGALT00000013786	BMPR-II	2.54004	0.0118214
	ENSGALG00000012518	ENSGALT00000020448	NOVEL	2.11543	0.0414234
	ENSGALG00000012617	ENSGALT00000020598	CHALK5	2.1051	0.01039
	ENSGALG00000012891	ENSGALT00000021025	TNFRSF11A	2.22997	0.0117279
	ENSGALG00000013372	ENSGALT00000021816	IL7R	4.00743	0.00315826
	ENSGALG00000013907	ENSGALT00000022562	KDR	2.23241	0.0467388
	ENSGALG00000013925	ENSGALT00000022571	KIT	3.38461	0.0225513
	ENSGALG00000014716	ENSGALT00000023728	GP130	3.51011	0.0116161
	ENSGALG00000014855	ENSGALT00000023973	GHR	3.2526	0.00242227
	ENSGALG00000014890	ENSGALT00000024021	TNFRSF1A	2.35164	0.00299218
	ENSGALG00000015938	ENSGALT00000025687	IFNAR2	1.67791	0.0222113
	ENSGALG00000015942	ENSGALT00000025691	IFNAR1	1.85703	0.0184416
	ENSGALG00000016783	ENSGALT00000027100	IL1R1	8.70427	6.54617e-05
	ENSGALG00000016786	ENSGALT00000027104	IL18R1	2.25027	0.0286516
	ENSGALG00000017091	ENSGALT00000027608	FLT1	2.90079	0.0321035
	ENSGALG00000016114	ENSGALT00000030811	TNFRSF11B	2.07019	0.0202733
	ENSGALG00000012363	ENSGALT00000037413	EGFR	3.6742	0.000643027
	ENSGALG00000003446	ENSGALT00000039164	PRLR	7.30253	0.000740845
	ENSGALG00000006351	ENSGALT00000039919	FAS	1.74429	0.0334867
	ENSGALG00000026663	ENSGALT00000043370	CX3CL1	2.12765	0.00767275
gga04142: Lysosome	ENSGALG00000000771	ENSGALT00000001117	PLA2G15	5.0284	0.002752
	ENSGALG00000003736	ENSGALT00000005928	ABCB9	2.4351	0.0228158
	ENSGALG00000006378	ENSGALT00000010304	LIPA	2.16802	0.0149181
	ENSGALG00000006613	ENSGALT00000010676	CTSD	3.66893	0.0279363
	ENSGALG00000010199	ENSGALT00000016578	MFSD8	2.55224	0.0107188
	ENSGALG00000010237	ENSGALT00000016641	NPC2	1.62575	0.0330303
	ENSGALG00000010811	ENSGALT00000017577	LGMN	2.22405	0.00636164
	ENSGALG00000011499	ENSGALT00000018738	SCARB2	2.53085	0.00299218
	ENSGALG00000012610	ENSGALT00000020588	CTSL2	3.09685	0.000220284
	ENSGALG00000012763	ENSGALT00000020826	GNPTAB	4.14283	0.00107389
	ENSGALG00000015030	ENSGALT00000024240	NPC1	1.61985	0.043219
	ENSGALG00000015238	ENSGALT00000024590	CD164	2.23186	0.0337575
	ENSGALG00000016479	ENSGALT00000026588	LAPTM4A	1.74395	0.0256795
	ENSGALG00000016829	ENSGALT00000027170	LAMP1	2.59281	0.00799902
	ENSGALG00000022706	ENSGALT00000036381	TPP1	2.39533	0.0125485
	ENSGALG00000016666	ENSGALT00000036722	CTSB	2.39064	0.036627
	ENSGALG00000028628	ENSGALT00000043979	LAPTM4B	2.45374	0.0244599
	ENSGALG00000026364	ENSGALT00000044806	ASAH1	2.02907	0.0435886
gga04514: Cell adhesion molecules (CAMs)	ENSGALG00000000608	ENSGALT00000000857	CDH1	1.89406	0.0319022
	ENSGALG00000001621	ENSGALT00000002477	CLDN5	3.82522	0.0279644
	ENSGALG00000003399	ENSGALT00000005376	SELE	2.73796	0.0240181
	ENSGALG00000003515	ENSGALT00000005557	NA	2.11498	0.00659741
	ENSGALG00000003932	ENSGALT00000006265	SDC4	2.26711	0.0297828
	ENSGALG00000005257	ENSGALT00000008441	VCAM1	2.42423	0.0117259
	ENSGALG00000005272	ENSGALT00000008459	CDH5	3.22059	0.00247731
	ENSGALG00000006593	ENSGALT00000010644	CLDN18	5.40162	0.0415906
	ENSGALG00000008656	ENSGALT00000014100	ICOS	3.84728	0.00426568
	ENSGALG00000008669	ENSGALT00000014115	CD28	27.8134	0.000125567
	ENSGALG00000015348	ENSGALT00000024769	ALCAM	1.82744	0.0189212
	ENSGALG00000015438	ENSGALT00000024901	MPZL1	2.9754	0.00935133
	ENSGALG00000015463	ENSGALT00000024930	CD2	3.96777	0.00130485
	ENSGALG00000015746	ENSGALT00000025394	JAM2	2.06884	0.00868533
	ENSGALG00000019114	ENSGALT00000030190	CLDN10	3.43007	0.0218894
	ENSGALG00000022557	ENSGALT00000036134	CLDN3	2.60659	0.0286644
	ENSGALG00000014477	ENSGALT00000037104	CD4	26.3007	0.000234227
	ENSGALG00000009362	ENSGALT00000038606	ITGA6	2.848	0.00862218
	ENSGALG00000027456	ENSGALT00000043243	OCLN	4.1122	0.00839491
	ENSGALG00000026862	ENSGALT00000044685	CLDN1	5.00097	0.000976702

## Sheet: down DEGs in S5 vs. NC5
Down-regulated differentilly expressed genes (DEGs) in the contrast of susceptible vs. non-challenged birds at day 5
gga04110: Cell cycle	Ensembl Gene ID	Ensembl Transcript ID	Associated Gene Name	Fold change	FDR
	ENSGALG00000000169	ENSGALT00000000225	PCNA	-1.87696	0.00463247
	ENSGALG00000000970	ENSGALT00000001434	STT3A	-2.77441	0.00225495
	ENSGALG00000001506	ENSGALT00000002291	PTTG1	-2.97353	9.27258e-05
	ENSGALG00000001616	ENSGALT00000002464	CDC45	-1.55699	0.0220752
	ENSGALG00000001722	ENSGALT00000002641	E2F4	-1.6665	0.0107384
	ENSGALG00000003085	ENSGALT00000004876	CDK1	-3.09852	0.000284764
	ENSGALG00000003485	ENSGALT00000005513	CCND3	-1.80015	0.0108616
	ENSGALG00000004161	ENSGALT00000006616	CCNB2	-2.22833	0.000901545
	ENSGALG00000006037	ENSGALT00000009723	MCM2	-1.66306	0.016454
	ENSGALG00000006110	ENSGALT00000009864	PLK1	-1.89828	0.00148426
	ENSGALG00000008175	ENSGALT00000013290	ORC5	-1.51714	0.0357292
	ENSGALG00000008233	ENSGALT00000013400	BUB1	-1.78597	0.00587932
	ENSGALG00000008585	ENSGALT00000013979	SMC3	-1.54636	0.0342491
	ENSGALG00000008963	ENSGALT00000014574	DBF4	-1.77319	0.00303491
	ENSGALG00000009681	ENSGALT00000015757	BUB3	-1.64934	0.00810014
	ENSGALG00000009956	ENSGALT00000016183	ESPL1	-1.59637	0.0194029
	ENSGALG00000009971	ENSGALT00000016208	CDC20	-2.91288	0.000256163
	ENSGALG00000011967	ENSGALT00000019519	MAD2L1	-1.98459	0.00315582
	ENSGALG00000011993	ENSGALT00000019565	RBX1	-1.83389	0.0425472
	ENSGALG00000012448	ENSGALT00000020350	ORC4	-2.42161	0.000544803
	ENSGALG00000012546	ENSGALT00000020490	MCM5	-2.4017	0.00026781
	ENSGALG00000012915	ENSGALT00000021064	MCM4	-1.95601	0.00214033
	ENSGALG00000015985	ENSGALT00000025761	CCNE2	-2.29343	0.000343404
	ENSGALG00000016676	ENSGALT00000026909	MCM3	-3.53597	1.41671e-05
	ENSGALG00000016823	ENSGALT00000027160	NA	-1.6372	0.0182697
	ENSGALG00000025810	ENSGALT00000043056	CCNB3	-2.67789	0.000363418
	ENSGALG00000003045	ENSGALT00000043768	E2F1	-3.05773	0.00045133
	ENSGALG00000005769	ENSGALT00000044761	WEE1	-1.63371	0.0251587
	ENSGALG00000028643	ENSGALT00000044835	ANAPC10	-2.06518	0.00587333
	ENSGALG00000025759	ENSGALT00000045629	TFDP2	-1.80145	0.0029172
gga04115: p53 signaling pathway	ENSGALG00000000970	ENSGALT00000001434	STT3A	-2.77441	0.00225495
	ENSGALG00000001018	ENSGALT00000001501	EI24	-1.50036	0.026585
	ENSGALG00000003085	ENSGALT00000004876	CDK1	-3.09852	0.000284764
	ENSGALG00000003485	ENSGALT00000005513	CCND3	-1.80015	0.0108616
	ENSGALG00000004161	ENSGALT00000006616	CCNB2	-2.22833	0.000901545
	ENSGALG00000004897	ENSGALT00000007817	GTSE1	-1.60083	0.0186871
	ENSGALG00000011020	ENSGALT00000017955	CYC	-2.08627	0.000754493
	ENSGALG00000015985	ENSGALT00000025761	CCNE2	-2.29343	0.000343404
	ENSGALG00000016442	ENSGALT00000026525	RRM2	-2.12219	0.000404999
	ENSGALG00000023335	ENSGALT00000038423	RCHY1	-1.8755	0.00925198
	ENSGALG00000025810	ENSGALT00000043056	CCNB3	-2.67789	0.000363418
	ENSGALG00000010638	ENSGALT00000045406	CASP3	-1.96595	0.00559515
gga04662: B cell receptor signaling pathway	ENSGALG00000000251	ENSGALT00000000330	CD79B	-1.79	0.0149545
	ENSGALG00000004958	ENSGALT00000007950	BTK	-2.1	0.00170272
	ENSGALG00000006973	ENSGALT00000011296	BLNK	-2.3	0.002426
	ENSGALG00000016661	ENSGALT00000026890	BLK	-1.9265	0.00642905
	ENSGALG00000025942	ENSGALT00000045661	VAV1	-3.37413	0.0132368

## Sheet: up DEGs in S5 vs. R5
Up-regulated differentilly expressed genes (DEGs) in the contrast of susceptible vs. resistant birds at day 5
gga04060: Cytokine-cytokine receptor interaction	Ensembl Gene ID	Ensembl Transcript ID	Associated Gene Name	Fold change	FDR
	ENSGALG00000006106	ENSGALT00000009858	TNFRSF6B	3.45981	0.00374447
	ENSGALG00000014716	ENSGALT00000023728	GP130	2.88847	0.0481111
	ENSGALG00000014855	ENSGALT00000023973	GHR	2.548	0.0257687
	ENSGALG00000016783	ENSGALT00000027100	IL1R1	2.8652	0.0463154
	ENSGALG00000016114	ENSGALT00000030811	TNFRSF11B	1.99121	0.0457923
	ENSGALG00000012363	ENSGALT00000037413	EGFR	2.23167	0.0442619
	ENSGALG00000003446	ENSGALT00000039164	PRLR	3.21408	0.0470112
	ENSGALG00000026663	ENSGALT00000043370	CX3CL1	2.00811	0.0255249
gga04142: Lysosome	ENSGALG00000000771	ENSGALT00000001117	PLA2G15	3.54656	0.0268595
	ENSGALG00000010811	ENSGALT00000017577	LGMN	2.01109	0.0295355
	ENSGALG00000011499	ENSGALT00000018738	SCARB2	2.08039	0.030876
	ENSGALG00000012610	ENSGALT00000020588	CTSL2	2.37514	0.0061845
	ENSGALG00000012763	ENSGALT00000020826	GNPTAB	3.16491	0.0113475
	ENSGALG00000016829	ENSGALT00000027170	LAMP1	2.23518	0.0405582
	ENSGALG00000026364	ENSGALT00000044806	ASAH1	2.14236	0.0477616
gga04514: Cell adhesion molecules (CAMs)	ENSGALG00000005272	ENSGALT00000008459	CDH5	2.39815	0.035535
	ENSGALG00000008656	ENSGALT00000014100	ICOS	3.13747	0.0246798
	ENSGALG00000008669	ENSGALT00000014115	CD28	16.6956	0.000466009
	ENSGALG00000015463	ENSGALT00000024930	CD2	3.17205	0.0110869
	ENSGALG00000022557	ENSGALT00000036134	CLDN3	2.80882	0.0312964
	ENSGALG00000014477	ENSGALT00000037104	CD4	29.2753	4.42874e-05
	ENSGALG00000026862	ENSGALT00000044685	CLDN1	3.7894	0.00821598

## Sheet: down DEGs in S5 vs. R5
Down-regulated differentilly expressed genes (DEGs) in the contrast of susceptible vs. resistant birds at day 5
gga04110: Cell cycle	Ensembl Gene ID	Ensembl Transcript ID	Associated Gene Name	Fold change	FDR
	ENSGALG00000000169	ENSGALT00000000225	PCNA	-1.66	0.0439397
	ENSGALG00000001506	ENSGALT00000002291	PTTG1	-2.14	0.012583
	ENSGALG00000003085	ENSGALT00000004876	CDK1	-2.26	0.0195457
	ENSGALG00000004161	ENSGALT00000006616	CCNB2	-1.79	0.0304859
	ENSGALG00000006110	ENSGALT00000009864	PLK1	-1.68	0.0233666
	ENSGALG00000008233	ENSGALT00000013400	BUB1	-1.62	0.0434393
	ENSGALG00000008963	ENSGALT00000014574	DBF4	-1.56	0.0405582
	ENSGALG00000009971	ENSGALT00000016208	CDC20	-2.27	0.0112294
	ENSGALG00000012448	ENSGALT00000020350	ORC4	-1.83	0.0339294
	ENSGALG00000012546	ENSGALT00000020490	MCM5	-1.92	0.0145457
	ENSGALG00000012915	ENSGALT00000021064	MCM4	-1.74	0.0246798
	ENSGALG00000015985	ENSGALT00000025761	CCNE2	-1.96	0.00809336
	ENSGALG00000016676	ENSGALT00000026909	MCM3	-2.58	0.00199562
	ENSGALG00000025810	ENSGALT00000043056	CCNB3	-2	0.0234575
	ENSGALG00000003045	ENSGALT00000043768	E2F1	-2.1	0.0364338
gga04115: p53 signaling pathway	ENSGALG00000003085	ENSGALT00000004876	CDK1	-2.25812	0.0195457
	ENSGALG00000004161	ENSGALT00000006616	CCNB2	-1.79001	0.0304859
	ENSGALG00000011020	ENSGALT00000017955	CYC	-1.70454	0.027888
	ENSGALG00000015985	ENSGALT00000025761	CCNE2	-1.96209	0.00809336
	ENSGALG00000025810	ENSGALT00000043056	CCNB3	-2.00478	0.0234575
gga04662: B cell receptor signaling pathway	ENSGALG00000006973	ENSGALT00000011296	BLNK	-2.00165	0.0254613
	ENSGALG00000004958	ENSGALT00000007950	BTK	-1.70685	0.0457923
	ENSGALG00000016661	ENSGALT00000026890	BLK	-1.7104	0.0484557

## Sheet: up DEGs in 5 vs. 1 susceptible
Up-regulated differentilly expressed genes (DEGs) in the contrast of day 5 vs. day 1 susceptible birds
gga04350: TGF-beta signaling pathway	Ensembl Gene ID	transcript id	Associated Gene Name	Fold change	FDR
	ENSGALG00000009626	ENSGALT00000015678	THBS1	2.15579	0.0349267
	ENSGALG00000014908	ENSGALT00000024043	FST	2.51514	0.0420046
	ENSGALG00000016293	ENSGALT00000026276	BMP5	2.20176	0.0386113
gga04514: Cell adhesion molecules (CAMs)	ENSGALG00000024340	ENSGALT00000009998	NA	11.19	0.0347574
	ENSGALG00000008656	ENSGALT00000014100	ICOS	3.43006	0.0381835
	ENSGALG00000015463	ENSGALT00000024930	CD2	3.57149	0.00848563
	ENSGALG00000015624	ENSGALT00000025190	VCAN	3.92103	0.0117453
	ENSGALG00000014477	ENSGALT00000037104	CD4	33.6116	3.9258e-05
